# Supplementary material for: Physiological Responses to Swimming-Induced Exercise in the Adult Zebrafish Regenerating Heart
Source: Front Physiol. 2018 Oct 1;9:1362. doi: 10.3389/fphys.2018.01362 (PMC6174316; doi:10.3389/fphys.2018.01362)
Supplement: Supplementary file 1 [file Table_1.xlsx]

## Sheet: allSIGpadj0.1
Table S1. List of differentially expressed genes in RNA sequencing.
Row.names	padj	T7_FC	T14_FC	gene_name_dr	description	Cluster
ENSDARG00000021882	0.0726167	1.30238	-1.49978	fbxl3b	F-box and leucine-rich repeat protein 3	1
ENSDARG00000018111	1.236e-05	-1.40264	-2.21348	kdm7aa	lysine (K)-specific demethylase 7A	1
ENSDARG00000068708	0.074078	1.006	-1.6091	ifrd1	interferon-related developmental regulator 1	1
ENSDARG00000101849	5.82488e-05	-1.15249	-1.67413	adipor2	adiponectin receptor 2	1
ENSDARG00000055903	0.0678987	1.04178	-1.31542	luc7l	LUC7-like (S. cerevisiae)	1
ENSDARG00000055118	0.00490106	-1.01885	-2.32812	mylipb	myosin regulatory light chain interacting protein	1
ENSDARG00000039987	0.0767407	-1.02436	-1.66114	hivep2a	human immunodeficiency virus type I enhancer binding protein 2	1
ENSDARG00000020031	0.0560611	-1.56454	-2.42157	cldn11a	claudin 11	1
ENSDARG00000078683	0.011309	-1.38865	-1.83935	RNF14	ring finger protein 14	1
ENSDARG00000079378	0.0220442	-1.28095	-1.48188	phldb1b	pleckstrin homology-like domain, family B, member 1	1
ENSDARG00000038785	0.027282	1.06345	-1.60711	abcf2a	ATP binding cassette subfamily F member 2	1
ENSDARG00000041411	0.0884925	1.09354	-1.85453	rad51	RAD51 recombinase	1
ENSDARG00000023026	0.000134464	-1.48402	-2.20226	pkp2	plakophilin 2	1
ENSDARG00000076791	0.0764748	1.22694	-1.43043	cdk13	cyclin-dependent kinase 13	1
ENSDARG00000094673	0.0701977	-1.17138	-1.27482	rhoab	ras homolog family member A	1
ENSDARG00000010752	0.00112719	-1.81409	-2.72703	acsl4b	acyl-CoA synthetase long-chain family member 4	1
ENSDARG00000004078	0.0316156	-1.29112	-1.74734	acsl4a	acyl-CoA synthetase long-chain family member 4	1
ENSDARG00000076362	0.0747129	1.17641	-1.77009	tmem260	transmembrane protein 260	1
ENSDARG00000042962	0.051578	-1.06461	-1.86597	dgcr2	DiGeorge syndrome critical region gene 2	1
ENSDARG00000068179	0.00569755	1.05831	-1.79964	trib2	tribbles pseudokinase 2	1
ENSDARG00000037574	0.0971856	-1.1713	-1.46389	rps6kal	ribosomal protein S6 kinase, 90kDa, polypeptide 6	1
ENSDARG00000042210	0.045247	-1.39698	-1.58127	sema3ab	sema domain, immunoglobulin domain (Ig), short basic domain, secreted, (semaphorin) 3A	1
ENSDARG00000101362	0.0545651	-1.31244	-2.10125	mibp	nicotinamide riboside kinase 2	1
ENSDARG00000104372	0.00569755	1.01673	-1.24352	gnb1b	Guanine nucleotide binding protein (G protein), beta polypeptide 1b	1
ENSDARG00000078842	0.024873	-1.4309	-1.68711	tns1a	tensin 1	1
ENSDARG00000098968	0.00584471	-1.55178	-1.83965	RSBN1	round spermatid basic protein 1	1
ENSDARG00000099148	0.0922243	-1.34377	-1.66567	bzw1b	basic leucine zipper and W2 domains 1	1
ENSDARG00000036685	0.0395107	-1.04513	-1.5345	ccnt2a	cyclin T2	1
ENSDARG00000097205	0.0103007	-1.12218	-1.61283	ulk2	unc-51 like autophagy activating kinase 2	1
ENSDARG00000009194	0.0236448	-1.19312	-1.45237	col16a1	collagen, type XVI, alpha 1	1
ENSDARG00000041895	0.0100792	-1.23961	-1.72924	cad	carbamoyl-phosphate synthetase 2, aspartate transcarbamylase, and dihydroorotase	1
ENSDARG00000075864	0.00183888	-3.12515	-4.64128	igsf9a	immunoglobulin superfamily member 9	1
ENSDARG00000067741	0.0544282	-1.15201	-1.82464	itpkcb	inositol-trisphosphate 3-kinase C	1
ENSDARG00000069135	0.00046297	-1.3868	-2.59172	ppp1r15a	protein phosphatase 1 regulatory subunit 15A	1
ENSDARG00000019304	0.0734013	-1.05762	-3.07681	phactr3b	phosphatase and actin regulator 3	1
ENSDARG00000039724	0.0019247	1.13666	-3.02016	OSBPL8	oxysterol binding protein like 8	1
ENSDARG00000063003	0.0914281	-1.24057	-1.41683	alkbh5	alkB homolog 5, RNA demethylase	1
ENSDARG00000098405	0.0356622	-1.12574	-1.43109	map3k1	mitogen-activated protein kinase kinase kinase 1, E3 ubiquitin protein ligase	1
ENSDARG00000103658	0.0491023	-1.21927	-1.52174	hivep1	human immunodeficiency virus type I enhancer binding protein 1	1
ENSDARG00000028396	0.00141034	-1.0714	-2.45749	fkbp5	FK506 binding protein 5	1
ENSDARG00000038518	0.0928326	-1.18152	-1.48513	snap29	synaptosome associated protein 29kDa	1
ENSDARG00000009459	0.00104009	-1.11383	-2.07825	slc35e4	solute carrier family 35 member E4	1
ENSDARG00000068830	0.0366509	1.0139	-1.79246	zgc:172139	KIAA0930	1
ENSDARG00000074287	0.000138131	-1.8675	-2.47346	sptlc2b	serine palmitoyltransferase, long chain base subunit 2	1
ENSDARG00000019360	0.0919032	-1.11476	-1.50692	sec23b	Sec23 homolog B, COPII coat complex component	1
ENSDARG00000016858	0.00107969	-1.06627	-1.58271	smad7	SMAD family member 7	1
ENSDARG00000016143	0.0015893	-1.22885	-1.52937	xiap	baculoviral IAP repeat containing 8	1
ENSDARG00000013351	0.0187705	-1.06593	-1.32559	cirbpb	cold inducible RNA binding protein	1
ENSDARG00000019371	0.000442833	-1.41818	-2.33274	flt1	fms-related tyrosine kinase 1	1
ENSDARG00000020872	0.00283457	-1.05908	-2.03497	nfat5a	nuclear factor of activated T-cells 5, tonicity-responsive	1
ENSDARG00000096310	0.016193	-1.0125	-1.65902	TAF1C	TATA-box binding protein associated factor, RNA polymerase I, C	1
ENSDARG00000030367	0.0115843	-1.17612	-2.18839	metrn	meteorin, glial cell differentiation regulator	1
ENSDARG00000074319	0.0316137	-1.0739	-1.41013	sall1a	spalt-like transcription factor 1	1
ENSDARG00000038792	8.36136e-08	-1.1294	-2.69373	klf17	Kruppel-like factor 1 (erythroid)	1
ENSDARG00000025073	0.0785446	-1.05359	-1.35596	rpl18a	ribosomal protein L18a	1
ENSDARG00000020761	0.0112681	-1.5232	-1.55063	arrdc2	arrestin domain containing 2	1
ENSDARG00000077300	0.0295801	-1.26286	-1.51883	usp42	ubiquitin specific peptidase 17-like family member 10	1																						Source:HGNC Symbol;Acc:HGNC:37175];ubiquitin specific peptidase 17-like family member 4	Source:HGNC Symbol;Acc:HGNC:37176];ubiquitin specific peptidase 17-like family member 5	Source:HGNC Symbol;Acc:HGNC:37177];ubiquitin specific peptidase 17-like family member 7	Source:HGNC Symbol;Acc:HGNC:37180];ubiquitin specific peptidase 17-like family member 8	Source:HGNC Symbol;Acc:HGNC:37181];ubiquitin specific peptidase 42	Source:HGNC Symbol;Acc:HGNC:20068]
ENSDARG00000018898	0.00372792	-1.29013	-1.61085	zfand5a	zinc finger, AN1-type domain 5	1
ENSDARG00000002271	0.00740369	-1.29802	-1.92395	zfand5b	zinc finger, AN1-type domain 5	1
ENSDARG00000056801	0.0512133	-1.3767	-1.31847	sufu	suppressor of fused homolog (Drosophila)	1
ENSDARG00000074168	6.54441e-07	-1.3591	-2.0655	fam208b	family with sequence similarity 208 member B	1
ENSDARG00000069066	0.0045669	-1.04288	-1.39611	nufip2	nuclear fragile X mental retardation protein interacting protein 2	1
ENSDARG00000060246	0.00496999	-1.55441	-2.43676	slc16a6b	solute carrier family 16 member 6	1
ENSDARG00000060994	0.0404627	-1.30165	-1.73115	fbxw7	F-box and WD repeat domain containing 7	1
ENSDARG00000061338	0.000378069	-1.04023	-1.91469	ddx6	DEAD (Asp-Glu-Ala-Asp) box helicase 6	1
ENSDARG00000102474	0.00161869	-1.10157	-1.46479	dusp16	dual specificity phosphatase 16	1
ENSDARG00000089878	0.00763926	-1.18761	-2.628	nedd9	neural precursor cell expressed, developmentally down-regulated 9	1
ENSDARG00000052690	0.0753231	-1.25111	-1.59741	arrdc3a	arrestin domain containing 3	1
ENSDARG00000017542	0.0785169	-1.4531	-1.82834	fgf1a	Fibroblast growth factor 1a	1
ENSDARG00000070864	0.000112338	-1.6232	-2.94358	bcl6a	B-cell CLL/lymphoma 6	1
ENSDARG00000069295	0.0710107	-1.79191	-2.60224	bcl6ab	B-cell CLL/lymphoma 6	1
ENSDARG00000006514	0.00553782	1.17872	-1.67868	her6	hes family bHLH transcription factor 1	1
ENSDARG00000099104	0.0595851	-1.01015	-1.34411	rpl24	ribosomal protein L24	1
ENSDARG00000061233	0.0220386	-1.48134	-1.59827	abcc5	ATP binding cassette subfamily C member 5	1
ENSDARG00000012968	0.0253132	-1.95425	-3.53877	rhoub	Ras homolog family member Ub	1
ENSDARG00000013946	9.45718e-08	-1.84341	-4.07472	ivns1abpb	influenza virus NS1A binding protein	1
ENSDARG00000035883	0.0260529	-1.25691	-1.79346	nt5c1aa	5'-nucleotidase, cytosolic IA	1
ENSDARG00000103038	0.0332995	1.02955	-1.71219	pik3r3a	phosphoinositide-3-kinase regulatory subunit 3	1
ENSDARG00000042904	0.000239043	-1.41712	-2.03952	foxo3b	forkhead box O3	1
ENSDARG00000040884	0.000369937	-1.32709	-1.97837	mxi1	MAX interactor 1, dimerization protein	1
ENSDARG00000098683	0.0162958	-2.06371	-1.6543	zmiz2	zinc finger, MIZ-type containing 2	1
ENSDARG00000041691	0.0346584	-1.28111	-2.51998	bhlhe41	basic helix-loop-helix family member e41	1
ENSDARG00000015649	0.0422357	1.07781	-1.24366	rap2c	RAP2C, member of RAS oncogene family	1
ENSDARG00000075842	0.0130591	1.06831	-2.33069	pigt	phosphatidylinositol glycan anchor biosynthesis class T	1
ENSDARG00000013522	0.000533394	-3.435	-18.752	pck1	phosphoenolpyruvate carboxykinase 1	1
ENSDARG00000100826	4.83571e-06	-1.2435	-2.2394	hif1al	hypoxia inducible factor 3, alpha subunit	1
ENSDARG00000086856	0.000317275	-1.27515	-2.58691	stk35	serine/threonine kinase 35	1
ENSDARG00000011125	0.0810275	-1.04261	-1.30927	snrpb	small nuclear ribonucleoprotein polypeptide N	1
ENSDARG00000024844	3.34104e-05	-1.25323	-1.89051	max	MYC associated factor X	1
ENSDARG00000042667	0.0307124	-1.07624	-2.21152	klf2a	Kruppel-like factor 2a	1
ENSDARG00000058488	0.000752088	-1.65782	-2.51698	adora2ab	adenosine A2a receptor	1
ENSDARG00000070426	0.00456079	-1.33682	-1.92506	chac1	ChaC glutathione-specific gamma-glutamylcyclotransferase 1	1
ENSDARG00000036135	0.0192524	-1.56295	-1.77065	bbox1	butyrobetaine (gamma), 2-oxoglutarate dioxygenase (gamma-butyrobetaine hydroxylase) 1	1
ENSDARG00000058444	4.75474e-06	1.13106	-2.31485	snx6	sorting nexin 6	1
ENSDARG00000032553	0.00250152	-1.96332	-4.13702	egln3	egl-9 family hypoxia-inducible factor 3	1
ENSDARG00000043484	0.0223036	1.06622	-1.26708	ube2d2	Ubiquitin-conjugating enzyme E2D 2 (UBC4/5 homolog, yeast)	1
ENSDARG00000059406	0.0262193	1.0573	-1.49506	raf1b	Raf-1 proto-oncogene, serine/threonine kinase	1
ENSDARG00000034503	2.23979e-07	-1.19565	-1.68658	per2	period circadian clock 2	1
ENSDARG00000088087	0.0391937	1.02615	-2.20436	KDM6B	lysine (K)-specific demethylase 6B	1
ENSDARG00000028943	2.95756e-07	-1.25542	-2.4544	mtss1la	metastasis suppressor 1-like	1
ENSDARG00000018856	0.0737064	-1.21011	-1.74042	dclk1a	doublecortin like kinase 1	1
ENSDARG00000027279	4.48286e-05	-1.42767	-2.21595	numb	numb homolog (Drosophila)	1
ENSDARG00000044010	0.0533301	-1.97076	-1.87674	loxl2a	lysyl oxidase-like 2a	1
ENSDARG00000058716	0.000430899	-1.14737	-7.79105	cept1a	choline/ethanolamine phosphotransferase 1	1
ENSDARG00000045886	0.0167901	-1.15423	-1.63452	slc38a2	solute carrier family 38 member 2	1
ENSDARG00000010160	0.0545651	-1.02876	-1.47601	rps15a	ribosomal protein S15a	1
ENSDARG00000058644	0.0195539	-1.16308	-1.66607	dnajb2	DnaJ heat shock protein family (Hsp40) member B2	1
ENSDARG00000075271	0.000739802	-1.10392	-1.65975	rapgef5a	Rap guanine nucleotide exchange factor 5	1
ENSDARG00000023933	0.00505871	1.09803	-1.82241	skila	SKI-like proto-oncogene	1
ENSDARG00000004187	4.02803e-07	-1.44421	-3.19572	zgc:122979	DnaJ heat shock protein family (Hsp40) member B5	1
ENSDARG00000069594	0.0587159	-1.25154	-1.34722	kif13a	kinesin family member 13A	1
ENSDARG00000031763	0.00154094	-1.38662	-1.69583	smad6b	SMAD family member 6	1
ENSDARG00000026766	0.0049005	-1.13166	-1.4689	bcl2l10	BCL2-like 10 (apoptosis facilitator	1
ENSDARG00000068934	0.00388691	-1.36188	-1.90219	cyp1b1	cytochrome P450 family 1 subfamily B member 1	1
ENSDARG00000017602	0.0257058	-1.44054	-1.75745	ccng2	cyclin G2	1
ENSDARG00000032653	0.0476932	1.14069	-2.68937	fam60a	family with sequence similarity 60 member A	1
ENSDARG00000006038	0.0124884	-1.23904	-1.81289	aebp2	AE binding protein 2	1
ENSDARG00000018149	0.000459317	-1.1793	-2.07513	slc38a4	solute carrier family 38 member 4	1
ENSDARG00000004714	0.0251469	-1.13268	-1.30708	tcf12	transcription factor 12	1
ENSDARG00000069006	0.0323534	-1.02269	-1.67562	tle3b	transducin like enhancer of split 3	1
ENSDARG00000013990	0.0173389	-1.1371	-1.51833	ube2q2	ubiquitin conjugating enzyme E2Q family member 2	1
ENSDARG00000010279	0.062112	-1.01943	-1.4359	scamp2	secretory carrier membrane protein 2	1
ENSDARG00000025797	0.00563591	1.152	-1.97179	abhd2a	abhydrolase domain containing 2	1
ENSDARG00000054978	0.0785446	-1.39716	-1.49922	kifc3	kinesin family member C3	1
ENSDARG00000077291	0.0920948	-1.05334	-1.26917	rps2	ribosomal protein S2	1
ENSDARG00000032619	0.0855833	-1.0077	-1.46146	tob1a	transducer of ERBB2, 1	1
ENSDARG00000061335	0.0499612	-1.18244	-1.25031	galnt1	polypeptide N-acetylgalactosaminyltransferase 1	1
ENSDARG00000017681	2.95756e-07	-1.67585	-2.41522	mapk4	mitogen-activated protein kinase 4	1
ENSDARG00000078904	0.0152107	-1.21376	-1.49296	brd4	bromodomain containing 4	1
ENSDARG00000022213	6.63204e-05	-1.00796	-2.37947	uck2b	uridine-cytidine kinase 2	1
ENSDARG00000016977	0.0478254	-1.42809	-1.39606	snx27b	sorting nexin family member 27	1
ENSDARG00000034852	0.0394826	-1.109	-2.2697	nt5c2l1	5'-nucleotidase domain containing 4	1
ENSDARG00000038429	0.0715985	-1.10545	-1.70382	csrnp1b	cysteine-serine-rich nuclear protein 1	1
ENSDARG00000016551	0.0953786	-1.13349	-1.40255	iqsec1b	IQ motif and Sec7 domain 1	1
ENSDARG00000099002	0.0262275	1.01069	-2.21769	creb5a	cAMP responsive element binding protein 5a	1
ENSDARG00000099144	0.0785446	-1.3743	-1.44772	igfbp3	insulin like growth factor binding protein 3	1
ENSDARG00000090337	0.0387119	1.21301	-2.07652	pprc1	peroxisome proliferator-activated receptor gamma, coactivator-related 1	1
ENSDARG00000015709	0.045847	-1.39816	-1.72849	hsd17b12a	hydroxysteroid (17-beta) dehydrogenase 12	1
ENSDARG00000037393	9.82569e-06	-1.28223	-3.00084	slc43a1a	solute carrier family 43 (amino acid system L transporter), member 1	1
ENSDARG00000017154	0.0380739	-1.25205	-1.64909	cables2b	Cdk5 and Abl enzyme substrate 2	1
ENSDARG00000069583	0.0010296	1.26822	-5.36145	CNDP1	carnosine dipeptidase 1 (metallopeptidase M20 family)	1
ENSDARG00000077726	0.0148071	1.14964	-2.14775	nocta	nocturnin	1
ENSDARG00000042557	0.0515176	-1.30764	-1.61705	rnf144ab	ring finger protein 144A	1
ENSDARG00000039486	0.000533394	-1.10575	-1.9127	bag3	BCL2 associated athanogene 3	1
ENSDARG00000068257	0.0137437	-1.09955	-4.4937	kcne4	potassium channel, voltage gated subfamily E regulatory beta subunit 4	1
ENSDARG00000053091	0.0170644	-1.68833	-1.67459	DAB2	Dab, mitogen-responsive phosphoprotein, homolog 2 (Drosophila)	1
ENSDARG00000044532	0.0785169	-1.78477	-4.08629	nr4a2b	nuclear receptor subfamily 4, group A, member 2b	1
ENSDARG00000018000	0.073157	-1.2449	-1.87082	ubp1	upstream binding protein 1 (LBP-1a)	1
ENSDARG00000105277	0.00806683	-1.15403	-1.59756	cnksr3	CNKSR family member 3	1
ENSDARG00000062933	0.0747635	-1.24512	-1.34571	cmip	c-Maf inducing protein	1
ENSDARG00000090468	0.0240742	-1.16215	-2.36587	ppp1r3aa	protein phosphatase 1 regulatory subunit 3A	1
ENSDARG00000017119	0.0887132	-1.22635	-1.32525	vps37a	vacuolar protein sorting 37 homolog A (S. cerevisiae)	1
ENSDARG00000055429	2.4559e-06	1.06742	-1.60401	kat6b	K(lysine) acetyltransferase 6B	1
ENSDARG00000063570	0.0595851	1.08153	-1.63025	dyrk1aa	dual specificity tyrosine-(Y)-phosphorylation regulated kinase 1A	1
ENSDARG00000024431	0.077506	-1.34704	-1.53725	CABZ01069595.1	v-ets avian erythroblastosis virus E26 oncogene homolog	1
ENSDARG00000087646	0.00272404	-1.75595	-4.16249	runx1	runt-related transcription factor 1	1
ENSDARG00000103592	0.0323534	-1.64152	-3.66933	runx1	runt-related transcription factor 1	1
ENSDARG00000039934	0.0478254	1.35707	-1.69361	hlcs	holocarboxylase synthetase (biotin-(proprionyl-CoA-carboxylase (ATP-hydrolysing)) ligase)	1
ENSDARG00000059587	0.0323643	-1.15783	-1.37199	CU928117.1		1
ENSDARG00000061161	0.0229501	1.09266	-2.26458	ube2j2	ubiquitin conjugating enzyme E2, J2	1
ENSDARG00000075437	0.0729729	-1.0633	-1.2641	shc1	SHC (Src homology 2 domain containing) transforming protein 1	1
ENSDARG00000092115	1.3473e-05	-1.18019	-1.96758	eif4a1a	eukaryotic translation initiation factor 4A1	1
ENSDARG00000019355	0.0677823	1.33774	-1.49889	coa7	cytochrome c oxidase assembly factor 7 (putative)	1
ENSDARG00000062060	0.007761	-1.16544	-1.43719	gmeb1	glucocorticoid modulatory element binding protein 1	1
ENSDARG00000104138	0.0409116	1.01953	-1.49345	igfbp7	insulin like growth factor binding protein 7	1
ENSDARG00000015156	0.0795075	-1.15391	-1.34109	fbln2	fibulin 2	1
ENSDARG00000061841	5.64623e-08	-1.29581	-2.43572	tiparp	TCDD-inducible poly(ADP-ribose) polymerase	1
ENSDARG00000031269	0.0997175	-1.14338	-1.61361	rnf123	ring finger protein 123	1
ENSDARG00000063031	0.000176197	-1.32336	-1.81343	rad54l2	RAD54-like 2 (S. cerevisiae)	1
ENSDARG00000030905	0.024873	-1.65036	-3.8956	cited2	Cbp/p300-interacting transactivator, with Glu/Asp rich carboxy-terminal domain, 2	1
ENSDARG00000059610	0.0487509	-1.09899	-1.78879	gpr146	G protein-coupled receptor 146	1
ENSDARG00000041051	0.0356992	-2.88738	-4.05401	mid1ip1a	MID1 interacting protein 1	1
ENSDARG00000052928	0.0719747	1.05774	-1.5081	arf6b	ADP ribosylation factor 6	1
ENSDARG00000104674	0.077573	-1.03661	-1.30583	CABZ01075268.1	chaperonin containing TCP1, subunit 2 (beta)	1
ENSDARG00000029751	2.39723e-10	-1.2397	-2.3633	wbp1lb	WW domain binding protein 1-like	1
ENSDARG00000001880	0.0997175	-1.21175	-1.53736	stx3a	syntaxin 3	1
ENSDARG00000018524	0.00148694	1.00251	-2.62632	midn	midnolin	1
ENSDARG00000036848	6.54441e-07	-1.59744	-2.23265	slc43a2a	solute carrier family 43 (amino acid system L transporter), member 2	1
ENSDARG00000037012	0.00250152	1.0237	-2.40811	slc3a2b	solute carrier family 3 (amino acid transporter heavy chain), member 2	1
ENSDARG00000001234	0.00429484	-1.21279	-1.92287	map4k2	mitogen-activated protein kinase kinase kinase kinase 2	1
ENSDARG00000037618	8.94739e-12	-1.72294	-3.95105	ddit4	DNA damage inducible transcript 4	1
ENSDARG00000098635	0.0517232	1.01363	-1.42587	irf2bp2b	interferon regulatory factor 2 binding protein 2	1
ENSDARG00000059646	0.0396482	-1.22241	-2.26485	nt5dc2	5'-nucleotidase domain containing 2	1
ENSDARG00000054087	7.81304e-06	-1.22434	-2.31799	irs1	insulin receptor substrate 1	1
ENSDARG00000089917	0.0240742	-1.35314	-1.8767	sh3tc2	SH3 domain and tetratricopeptide repeats 2	1
ENSDARG00000061368	0.000238199	-1.29184	-2.56367	klf13	Kruppel-like factor 13	1
ENSDARG00000062315	0.0600105	1.13476	-1.74694	sik2b	salt inducible kinase 2	1
ENSDARG00000091902	0.0392053	-1.17757	-1.96164	b3gnt2b	UDP-GlcNAc:betaGal beta-1,3-N-acetylglucosaminyltransferase 2	1
ENSDARG00000022424	0.0447284	-1.17778	-1.70469	slc26a5	solute carrier family 26 (anion exchanger), member 5	1
ENSDARG00000023868	0.0213784	-1.3052	-1.589	AKAP13	A-kinase anchoring protein 13	1
ENSDARG00000069928	0.0102929	1.10306	-2.34015	prkceb	protein kinase C, epsilon	1
ENSDARG00000090512	0.0591453	-1.01001	-1.81866	trim8a	tripartite motif containing 8	1
ENSDARG00000071566	0.000891404	-1.07198	-1.56207	ppp1cab	Protein phosphatase 1, catalytic subunit, alpha isozyme b	1
ENSDARG00000060954	0.0511299	-1.06523	-1.39422	tmcc1b	transmembrane and coiled-coil domain family 1	1
ENSDARG00000034117	9.45718e-08	-1.41115	-1.88232	rarga	retinoic acid receptor, gamma	1
ENSDARG00000099178	0.00388691	-1.28809	-3.39204	CABZ01033309.1	ATP binding cassette subfamily D member 2	1
ENSDARG00000059409	0.0201388	-1.07906	-2.98336	ABCD2	ATP binding cassette subfamily D member 2	1
ENSDARG00000057767	1.92064e-06	-1.08565	-1.79882	nudt4a	Nudix (nucleoside diphosphate linked moiety X)-type motif 4a	1
ENSDARG00000018441	0.0980268	-1.31913	-1.45382	heg	heart development protein with EGF-like domains 1	1
ENSDARG00000001803	1.50242e-05	-1.36095	-2.2172	kcnh6a	potassium voltage-gated channel, subfamily H (eag-related), member 6a	1
ENSDARG00000087186	0.0213642	-1.15616	-1.53973	ZHX3	zinc fingers and homeoboxes 3	1
ENSDARG00000005122	0.0100792	-1.26814	-1.41403	atp2a2b	ATPase, Ca++ transporting, cardiac muscle, slow twitch 2	1
ENSDARG00000062721	4.05273e-10	-1.78421	-3.66057	dennd4a	DENN/MADD domain containing 4A	1
ENSDARG00000003820	0.0202572	-1.06355	-2.44858	nr1d2a	Nuclear receptor subfamily 1, group D, member 2a	1
ENSDARG00000101018	1.77255e-13	-1.79776	-3.10619	ptdss2	phosphatidylserine synthase 2	1
ENSDARG00000088593	0.0313276	-1.40156	-3.14638	chst1	carbohydrate (keratan sulfate Gal-6) sulfotransferase 1	1
ENSDARG00000043154	0.00569755	-1.2205	-1.70545	ucp2	uncoupling protein 2 (mitochondrial, proton carrier)	1
ENSDARG00000018146	0.036997	1.27215	-1.57171	gpx1a	glutathione peroxidase 2	1
ENSDARG00000016830	0.0277674	-1.45322	-1.77493	rimkla	ribosomal modification protein rimK-like family member A	1
ENSDARG00000055493	1.40313e-07	-1.32577	-2.63744	hic1	hypermethylated in cancer 1	1
ENSDARG00000002377	0.0491023	-1.27665	-1.53027	mief2	mitochondrial elongation factor 2	1
ENSDARG00000011201	0.0426659	-1.07516	-1.4367	rplp2l	ribosomal protein, large, P2	1
ENSDARG00000036161	0.0437234	1.00287	-1.25547	hnrnpa0l	heterogeneous nuclear ribonucleoprotein A0	1
ENSDARG00000025766	0.0810275	1.23528	-3.45248	DTX3	deltex 3, E3 ubiquitin ligase	1
ENSDARG00000076520	0.00205962	-1.95068	-6.96678	mafb	v-maf avian musculoaponeurotic fibrosarcoma oncogene homolog	1
ENSDARG00000070256	0.0613671	-1.16574	-1.51204	suz12a	SUZ12 polycomb repressive complex 2 subunit	1
ENSDARG00000045036	0.0056247	-1.17491	-1.97995	cdc42ep4b	CDC42 effector protein (Rho GTPase binding) 4	1
ENSDARG00000055530	0.00991063	-1.27689	-1.57934	sertad2b	SERTA domain containing 2	1
ENSDARG00000035552	0.0917573	-1.03739	-1.82878	agtr2	angiotensin II receptor, type 2	1
ENSDARG00000013310	0.0251469	-1.99241	-1.87379	map3k15	mitogen-activated protein kinase kinase kinase 15	1
ENSDARG00000070743	2.95756e-07	-1.49982	-2.42076	tmem45a	transmembrane protein 45A	1
ENSDARG00000005586	0.0165973	-1.04332	-1.64211	zbtb20	zinc finger and BTB domain containing 20	1
ENSDARG00000086075	0.0230595	-1.27018	-1.46671	ttc3	tetratricopeptide repeat domain 3	1
ENSDARG00000020465	0.0243362	-1.03449	-1.25256	ewsr1b	EWS RNA binding protein 1	1
ENSDARG00000035676	0.0764748	-1.01356	-1.33794	ptp4a2b	protein tyrosine phosphatase type IVA, member 2	1
ENSDARG00000029944	0.0183267	-1.24316	-2.38812	parpbp	PARP1 binding protein	1
ENSDARG00000056376	3.12326e-12	-1.49941	-5.7784	ankrd37	ankyrin repeat domain 37	1
ENSDARG00000056831	0.000384041	-1.31562	-1.78054	gng2	guanine nucleotide binding protein (G protein), gamma 2	1
ENSDARG00000062646	0.0491023	-1.25849	-1.34859	tet3	tet methylcytosine dioxygenase 3	1
ENSDARG00000011122	1.61571e-13	-2.20748	-3.54088	pptc7a	PTC7 protein phosphatase homolog	1
ENSDARG00000091592	0.000147487	-1.21719	-3.47127	peli1a	Pellino E3 ubiquitin protein ligase 1a	1
ENSDARG00000075727	0.0785446	-3.13547	-2.91258	map1lc3cl	Microtubule-associated protein 1 light chain 3 gamma, like	1
ENSDARG00000080010	0.00928968	-1.06835	-1.36402	adh5	alcohol dehydrogenase 5 (class III), chi polypeptide	1
ENSDARG00000076950	0.00146647	-1.11726	-2.41113	kel	Kell blood group, metallo-endopeptidase	1
ENSDARG00000091419	0.0199636	-1.1817	-1.6867	nrarpa	NOTCH-regulated ankyrin repeat protein	1
ENSDARG00000061437	1.65373e-05	-1.14257	-2.07151	inpp5f	inositol polyphosphate-5-phosphatase F	1
ENSDARG00000078095	0.0426659	-1.23485	-1.42495	cipcb	CLOCK-interacting pacemaker	1
ENSDARG00000081270	0.0528088	-1.35661	-4.38934	rn7sk	RNA, 7SK small nuclear pseudogene 176	1
ENSDARG00000022280	0.0195539	-1.03692	-1.41665	brd2a	bromodomain containing 2	1
ENSDARG00000032651	0.0056247	-1.18862	-1.48644	ppp1r10	proline rich 3	1
ENSDARG00000010010	0.0510068	1.07367	-1.53222	trim13	tripartite motif containing 13	1
ENSDARG00000033046	0.0486319	-1.05875	-1.59824	ccni2	cyclin I family member 2	1
ENSDARG00000045305	0.000135509	1.14537	-1.92437	pde7a	phosphodiesterase 7A	1
ENSDARG00000058285	0.0290881	-1.02772	-1.43641	cpt1b	carnitine palmitoyltransferase 1B	1
ENSDARG00000102171	0.00538563	-1.14316	-1.94327	fnip1	folliculin interacting protein 1	1
ENSDARG00000041435	0.0845114	-1.04934	-1.34026	uba52	Ubiquitin A-52 residue ribosomal protein fusion product 1	1
ENSDARG00000057687	0.0394826	-1.33963	-1.94568	sbk3	SH3 domain binding kinase family, member 3	1
ENSDARG00000028389	0.0956157	-1.47729	-1.6681	rab44	RAB44, member RAS oncogene family	1
ENSDARG00000078882	0.00159755	-1.08022	-1.87266	SLC22A31	solute carrier family 22 member 31	1
ENSDARG00000036107	0.0479917	-1.32631	-1.46917	txnipa	thioredoxin interacting protein	1
ENSDARG00000069342	0.00741963	-1.04921	-1.66918	zgc:153115		1
ENSDARG00000087732	3.88071e-20	-1.21616	-24.7514	Metazoa_SRP	RNA, 7SL, cytoplasmic 22, pseudogene	1
ENSDARG00000104790	3.71958e-17	-1.04024	-10.6415	otud4	OTU deubiquitinase 4	1
ENSDARG00000096403	1.20096e-16	-1.03231	-14.3574	si:dkey-153m14.1		1
ENSDARG00000090814	2.44854e-15	-2.36728	-7.02295	si:dkey-18a10.3		1
ENSDARG00000089382	8.94739e-12	-1.0827	-13.2585	zgc:158463		1
ENSDARG00000104129	4.94936e-08	-1.2929	-14.2891	si:dkey-23n7.10		1
ENSDARG00000031336	7.3328e-05	-2.91987	-4.02134	hsd20b2	hydroxysteroid (20-beta) dehydrogenase 2	1
ENSDARG00000018048	9.11727e-05	-1.85002	-3.52535	zgc:171704		1
ENSDARG00000094295	0.000396811	-1.23587	-2.4166	si:dkey-4i23.7		1
ENSDARG00000088449	0.000835121	-1.64564	-1.88004	wu:fb55g09		1
ENSDARG00000099719	0.00165914	-1.12982	-1.88883	cdkn1d	cyclin-dependent kinase inhibitor 1	1
ENSDARG00000036414	0.00250587	-1.39804	-2.29513	CU019646.1		1
ENSDARG00000033501	0.0030913	-1.11917	-1.74517	zgc:64189		1
ENSDARG00000096508	0.0113116	-1.00927	-2.12406	si:ch211-265g21.1		1
ENSDARG00000096717	0.0113116	-1.39065	-2.15687	si:rp71-1c10.7		1
ENSDARG00000104899	0.0152107	1.153	-4.03356	si:dkey-242k1.4		1
ENSDARG00000089307	0.0213784	1.17416	-2.36152	pmaip1	Phorbol-12-myristate-13-acetate-induced protein 1	1
ENSDARG00000015557	0.0295801	-1.10549	-1.45675	zgc:100829		1
ENSDARG00000105102	0.0338489	1.13056	-1.62054	crsp7	Cofactor required for Sp1 transcriptional activation, subunit 7	1
ENSDARG00000091946	0.0356622	-1.33034	-2.3727	si:ch211-139k8.2		1
ENSDARG00000100697	0.0425949	-1.19461	-6.14228	si:ch73-52f24.4		1
ENSDARG00000076357	0.0428976	1.49435	-3.57599	CABZ01102039.1		1
ENSDARG00000077862	0.0474337	1.25663	-4.35181	si:dkey-169i5.4		1
ENSDARG00000095427	0.0514342	-1.1797	-1.56852	si:ch211-152p11.8		1
ENSDARG00000031776	0.0620983	-1.28586	-1.43269	zgc:92066		1
ENSDARG00000003017	0.0737709	-1.10911	-1.41235	zgc:55512		1
ENSDARG00000095692	0.0810275	1.09946	-3.205	si:ch211-210h11.7		1
ENSDARG00000016429	0.0800832	-1.31065	-1.56179	farp2	FERM, ARH/RhoGEF and pleckstrin domain protein 2	2
ENSDARG00000011583	0.050041	-1.0506	-1.41318	cry1ab	cryptochrome circadian clock 1	2
ENSDARG00000020107	2.72998e-05	-1.1058	-1.56547	usp2a	ubiquitin specific peptidase 2	2
ENSDARG00000074275	0.0840802	-1.65835	-2.48794	limch1a	LIM and calponin homology domains 1	2
ENSDARG00000102161	0.0428285	-1.9326	-5.98842	SDK2	sidekick cell adhesion molecule 2	2
ENSDARG00000103684	0.000179407	-1.23516	-1.94757	ap4e1	adaptor related protein complex 4, epsilon 1 subunit	2
ENSDARG00000011373	0.0383884	-1.41323	-1.99915	mknk2a	MAP kinase interacting serine/threonine kinase 2	2
ENSDARG00000061354	0.074078	-1.12554	-1.39918	foxred2	FAD-dependent oxidoreductase domain containing 2	2
ENSDARG00000102490	0.0160158	-1.20012	-1.72721	asb2b	ankyrin repeat and SOCS box containing 2	2
ENSDARG00000029818	0.0487128	-1.11863	-1.33716	srsf5a	Serine/arginine-rich splicing factor 5a	2
ENSDARG00000035835	0.0517232	-1.55817	-1.65463	eef2k	eukaryotic elongation factor 2 kinase	2
ENSDARG00000038826	0.0565008	-1.20615	-1.47514	jph1b	junctophilin 1	2
ENSDARG00000054271	0.00203839	-1.34112	-1.84406	cdkn1bb	cyclin-dependent kinase inhibitor 1B (p27, Kip1)	2
ENSDARG00000025397	0.00914771	-1.19805	-2.02004	srsf3a	serine/arginine-rich splicing factor 3	2
ENSDARG00000012397	0.00106028	-1.6477	-1.86882	eya4	EYA transcriptional coactivator and phosphatase 4	2
ENSDARG00000105083	0.0861748	-3.17126	-3.34462	chd5	chromodomain helicase DNA binding protein 5	2
ENSDARG00000034826	0.0395107	1.19746	-1.29698	park7	parkinson protein 7	2
ENSDARG00000062972	0.0259213	-1.05044	-1.274	hip1	huntingtin interacting protein 1	2
ENSDARG00000033706	0.00388691	-1.02832	-1.6086	adora2aa	adenosine A2a receptor	2
ENSDARG00000056483	0.0159436	1.00669	-1.43935	ssbp4	single stranded DNA binding protein 4	2
ENSDARG00000014577	9.50064e-05	-1.66885	-2.0223	rhpn2	rhophilin, Rho GTPase binding protein 2	2
ENSDARG00000033009	0.0670777	-1.03238	-1.24418	h3f3b.1	H3 histone, family 3B (H3.3B)	2
ENSDARG00000003081	0.062112	1.65629	-1.90739	mybphb	myosin binding protein H-like	2
ENSDARG00000026329	0.0227911	-1.12864	-1.38826	arhgap29a	Rho GTPase activating protein 29	2
ENSDARG00000098955	0.0015893	-1.48851	-2.23972	ssh2b	slingshot protein phosphatase 2	2
ENSDARG00000006125	0.015186	-1.16771	-1.35227	csnk1db	casein kinase 1, delta	2
ENSDARG00000003974	0.0503483	-1.28118	-1.52697	spoplb	speckle type POZ protein like	2
ENSDARG00000087187	0.00978045	1.05431	-2.09801	grip2a	glutamate receptor interacting protein 2a	2
ENSDARG00000056627	0.0409727	-1.31304	-1.78492	cxcl14	chemokine (C-X-C motif) ligand 14	2
ENSDARG00000055412	0.0152107	-1.35654	-2.1368	mylk4b	myosin light chain kinase family member 4	2
ENSDARG00000062854	0.0714256	-2.13672	-1.97697	sdk1b	sidekick cell adhesion molecule 1	2
ENSDARG00000056805	0.0670777	1.12818	-2.70647	plch2b	phospholipase C eta 2	2
ENSDARG00000077295	0.00637688	-2.37267	-1.88029	akap6	A-kinase anchoring protein 6	2
ENSDARG00000089885	0.080458	-1.83038	-5.04654	slc16a12b	solute carrier family 16 member 12	2
ENSDARG00000002362	0.00270116	-1.32712	-1.6237	ubald1a	UBA-like domain containing 1a	2
ENSDARG00000102369	0.00019173	-5.34506	-5.85419	st3gal2	ST3 beta-galactoside alpha-2,3-sialyltransferase 2	2
ENSDARG00000098108	0.0159436	-2.54672	-3.15979	dusp2	dual specificity phosphatase 2	2
ENSDARG00000018159	2.91721e-05	-1.48507	-2.05408	ano10b	anoctamin 10b	2
ENSDARG00000056268	0.0318229	-1.03195	-1.92482	atxn7l2b	ataxin 7-like 2	2
ENSDARG00000036894	0.025698	-1.2017	-3.34114	AIMP1	aminoacyl tRNA synthetase complex-interacting multifunctional protein 1	2
ENSDARG00000089871	0.0395107	-1.33246	-1.43032	si:ch211-203c7.2	KIAA1462	2
ENSDARG00000061977	0.0031554	-1.17628	-1.6469	ppfibp2a	PTPRF interacting protein, binding protein 2 (liprin beta 2)	2
ENSDARG00000040280	0.0416921	-1.13427	-1.39494	FAM84B	family with sequence similarity 84 member B	2
ENSDARG00000036239	0.0481438	-1.08997	-1.90598	gatm	glycine amidinotransferase (L-arginine:glycine amidinotransferase)	2
ENSDARG00000007344	0.0137498	-1.41472	-2.1824	tcap	titin-cap	2
ENSDARG00000067713	2.649e-07	-1.25418	-2.40669	snx18a	sorting nexin 18	2
ENSDARG00000068894	0.038082	-1.22192	-1.53593	nrip1b	nuclear receptor interacting protein 1	2
ENSDARG00000038559	0.0146068	-1.07493	-1.47026	h1f0	H1 histone family member 0	2
ENSDARG00000092052	0.0284063	-1.71821	-3.58071	GSTK1	glutathione S-transferase kappa 1	2
ENSDARG00000010137	0.0710107	-1.26423	-1.40419	ldb1a	LIM domain binding 1	2
ENSDARG00000005232	0.0896706	-1.39861	-1.55514	ccdc85ca	coiled-coil domain containing 85C	2
ENSDARG00000099448	0.00135954	-1.66038	-2.15876	sh3d21	SH3 domain containing 21	2
ENSDARG00000104576	0.0354205	-2.45257	-4.63593	PPP1R3G	protein phosphatase 1 regulatory subunit 3G	2
ENSDARG00000008383	0.0914281	1.0606	-1.18886	arpc1a	actin related protein 2/3 complex subunit 1A	2
ENSDARG00000078975	0.0594147	-2.31342	-3.50069	igl1c3	immunoglobulin light 1 constant 3	2
ENSDARG00000090986	0.0069931	-1.58487	-1.81146	si:dkeyp-115e12.6		2
ENSDARG00000053857	0.0112681	-1.16548	-1.44757	ccdc187	Coiled-coil domain containing 187	2
ENSDARG00000088195	0.015186	-1.37547	-1.68026	wu:fb52c12		2
ENSDARG00000101844	0.0152107	-1.04713	-1.33646	mibp2	Muscle-specific beta 1 integrin binding protein 2	2
ENSDARG00000097646	0.0784842	-1.42303	-1.89465	si:dkey-16p21.6		2
ENSDARG00000018773	0.0106887	1.00081	1.60424	HIVEP2	human immunodeficiency virus type I enhancer binding protein 2	3
ENSDARG00000056642	4.10032e-07	1.31392	1.87415	hdac9b	histone deacetylase 9	3
ENSDARG00000033380	0.0286743	-1.5661	4.27277	gyg2	Glycogenin 2	3
ENSDARG00000078102	0.0334274	1.48959	1.71914	PSD	pleckstrin and Sec7 domain containing	3
ENSDARG00000019613	0.0323534	-1.11268	1.3781	ip6k2b	inositol hexakisphosphate kinase 2	3
ENSDARG00000052139	0.0455454	1.07712	1.98441	notch3	notch 3	3
ENSDARG00000038687	6.54441e-07	1.18629	1.99184	nfkb2	nuclear factor of kappa light polypeptide gene enhancer in B-cells 2 (p49/p100)	3
ENSDARG00000076075	0.0573851	1.2613	1.52565	myh7ba	myosin, heavy chain 7B, cardiac muscle, beta	3
ENSDARG00000099479	0.0160082	1.35069	1.49933	SYDE2	synapse defective 1, Rho GTPase, homolog 2 (C. elegans)	3
ENSDARG00000006181	3.88569e-06	1.31581	1.94522	hif1aa	hypoxia inducible factor 1, alpha subunit (basic helix-loop-helix transcription factor)	3
ENSDARG00000022996	0.0137498	1.5348	1.70418	setx	senataxin	3
ENSDARG00000030156	0.0880989	1.17164	1.45192	naglu	N-acetylglucosaminidase, alpha	3
ENSDARG00000068213	0.01881	-1.76222	3.33831	fzd10	frizzled class receptor 10	3
ENSDARG00000056691	0.0394826	1.73831	1.57321	cpeb4	cytoplasmic polyadenylation element binding protein 4	3
ENSDARG00000060316	0.00171447	-1.33416	2.23771	cish	cytokine inducible SH2-containing protein	3
ENSDARG00000078419	0.0104037	1.62145	1.69039	filip1a	filamin A interacting protein 1	3
ENSDARG00000051748	0.074078	1.3814	1.7073	ccnd2a	cyclin D2	3
ENSDARG00000014554	5.67595e-06	1.1594	1.64886	ppp1r3cb	protein phosphatase 1 regulatory subunit 3C	3
ENSDARG00000037421	9.82569e-06	-1.01812	2.82157	egr1	early growth response 1	3
ENSDARG00000045557	0.00643526	1.22543	3.42873	socs2	suppressor of cytokine signaling 2	3
ENSDARG00000021889	0.0014939	1.20868	2.17118	gja3	gap junction protein alpha 3	3
ENSDARG00000101361	0.000588853	1.22141	1.93047	znf644a	zinc finger protein 644	3
ENSDARG00000069538	0.0709913	-1.00454	2.3718	gtf3c4	general transcription factor IIIC subunit 4	3
ENSDARG00000015221	0.0758588	-1.01324	1.41729	nsrp1	nuclear speckle splicing regulatory protein 1	3
ENSDARG00000070578	0.0649177	-1.05819	2.20172	edn2	endothelin 2	3
ENSDARG00000094646	6.63204e-05	1.2116	2.02522	dyrk2	dual specificity tyrosine-(Y)-phosphorylation regulated kinase 2	3
ENSDARG00000101290	0.0599796	-5.18966	6.77599	si:dkey-203a12.8		3
ENSDARG00000071562	2.0927e-05	1.53555	2.97394	mtus1a	microtubule associated tumor suppressor 1	3
ENSDARG00000045947	0.0165702	-1.16479	1.74926	TRPM4	histidine rich calcium binding protein	3
ENSDARG00000077040	0.00785759	1.06802	1.62151	RIN2	Ras and Rab interactor 2	3
ENSDARG00000075461	0.00377646	-1.01252	1.64127	suv420h2	lysine (K)-specific methyltransferase 5C	3
ENSDARG00000018296	0.0389954	1.42449	1.58155	rev1	REV1, DNA directed polymerase	3
ENSDARG00000055647	0.0286743	1.07382	1.84562	ftr82	tripartite motif containing 29	3
ENSDARG00000006491	0.0517232	-1.07175	2.24082	agpat9l	glycerol-3-phosphate acyltransferase 3	3
ENSDARG00000045694	9.68877e-05	1.11734	2.50838	prickle1b	prickle homolog 1	3
ENSDARG00000061145	7.25896e-05	1.26791	2.86823	gfod2	glucose-fructose oxidoreductase domain containing 2	3
ENSDARG00000088440	0.000267332	1.03953	1.58608	ssh2a	slingshot protein phosphatase 2	3
ENSDARG00000075670	3.61643e-05	1.64124	2.0113	rereb	arginine-glutamic acid dipeptide (RE) repeats	3
ENSDARG00000023062	0.0015893	1.03798	1.92295	cyr61	cysteine-rich, angiogenic inducer, 61	3
ENSDARG00000070600	0.00538563	1.17582	1.62585	DYRK3	dual specificity tyrosine-(Y)-phosphorylation regulated kinase 3	3
ENSDARG00000045254	0.055146	-1.40232	2.16876	C24H7orf50	chromosome 7 open reading frame 50	3
ENSDARG00000089860	0.00925029	1.18318	2.67312	atxn7l1	ataxin 7-like 1	3
ENSDARG00000011876	0.072274	1.10259	1.34638	ednraa	endothelin receptor type A	3
ENSDARG00000021806	0.000105164	-1.06088	1.54841	zfp36l2	ZFP36 ring finger protein-like 2	3
ENSDARG00000028027	0.00388691	1.075	1.46064	trim63a	tripartite motif containing 63, E3 ubiquitin protein ligase	3
ENSDARG00000086685	0.0258531	1.28212	1.53912	trim63b	tripartite motif containing 63, E3 ubiquitin protein ligase	3
ENSDARG00000102778	0.00574076	1.77635	2.15802	fgf17	fibroblast growth factor 17	3
ENSDARG00000009610	0.030421	1.4854	1.4824	rgs12a	regulator of G-protein signaling 12	3
ENSDARG00000060900	0.0160082	1.34617	1.82272	znf362a	zinc finger protein 362	3
ENSDARG00000003165	0.0199636	1.17952	1.79131	nr2f6b	nuclear receptor subfamily 2 group F member 6	3
ENSDARG00000009881	0.0394826	1.022	1.42244	ier5	immediate early response 5	3
ENSDARG00000035161	0.00148694	1.68431	2.05244	pkdcca	protein kinase domain containing, cytoplasmic	3
ENSDARG00000052783	0.00396838	1.44132	1.69298	cdc42ep3	CDC42 effector protein (Rho GTPase binding) 3	3
ENSDARG00000025420	0.0395107	-1.80881	1.78633	fzd5	frizzled class receptor 5	3
ENSDARG00000069775	0.0565602	-1.01642	2.1576	fbxo40.1	F-box protein 40	3
ENSDARG00000091127	0.0861716	1.2082	2.10132	klf15	Kruppel-like factor 15	3
ENSDARG00000008305	7.78109e-05	-1.02237	1.64013	hand2	heart and neural crest derivatives expressed 2	3
ENSDARG00000013526	0.0258051	-1.08216	1.36895	SVEP1	sushi, von Willebrand factor type A, EGF and pentraxin domain containing 1	3
ENSDARG00000037060	0.00128237	1.01613	1.57331	kmt2d	lysine (K)-specific methyltransferase 2D	3
ENSDARG00000056920	0.0094667	1.14081	1.55904	tmem88a	transmembrane protein 88	3
ENSDARG00000098817	0.00399862	1.09972	2.30848	KCTD5	potassium channel tetramerization domain containing 5	3
ENSDARG00000006010	0.0633336	-1.06029	1.71632	bmi1a	BMI1 proto-oncogene, polycomb ring finger	3
ENSDARG00000098209	0.0389954	1.27183	2.02413	SIMC1	SUMO-interacting motifs containing 1	3
ENSDARG00000027199	0.0258506	1.28673	1.39705	smad1	SMAD family member 1	3
ENSDARG00000101831	0.0321109	-1.28021	2.02302	irx1a	iroquois homeobox 1	3
ENSDARG00000001785	0.000835121	-1.38172	2.62784	irx2a	iroquois homeobox 2	3
ENSDARG00000036956	0.0650432	1.03158	1.5169	asxl1	additional sex combs like 1, transcriptional regulator	3
ENSDARG00000030547	0.00399862	1.27592	1.93615	rnd1	Rho family GTPase 1	3
ENSDARG00000103713	0.015186	-1.30774	1.54065	cd248a	CD248 molecule, endosialin	3
ENSDARG00000098112	0.0397486	-1.29976	2.10514	btc	betacellulin	3
ENSDARG00000060177	0.0462268	1.11944	1.53208	vcpip1	valosin containing protein (p97)/p47 complex interacting protein 1	3
ENSDARG00000036102	0.0069931	1.12286	1.60279	ctdsp2	CTD small phosphatase 2	3
ENSDARG00000086945	0.0201429	1.11894	1.48026	C12H10orf71	chromosome 10 open reading frame 71	3
ENSDARG00000071467	0.00107822	-1.0744	1.97039	zbtb33	zinc finger and BTB domain containing 33	3
ENSDARG00000091128	0.0757851	1.21216	1.51828	LRRC75B	leucine rich repeat containing 75B	3
ENSDARG00000101009	0.00223244	-1.2559	1.79996	cited4b	Cbp/p300-interacting transactivator, with Glu/Asp rich carboxy-terminal domain, 4	3
ENSDARG00000068965	0.0021209	1.31343	1.68966	nrip1a	nuclear receptor interacting protein 1	3
ENSDARG00000070717	0.0190431	1.33434	1.56292	slc25a18	solute carrier family 25 (glutamate carrier), member 18	3
ENSDARG00000056678	0.0327351	1.20146	1.68825	trim47	tripartite motif containing 69	3
ENSDARG00000057582	0.00704484	1.38103	1.46376	KLHL34	kelch like family member 34	3
ENSDARG00000056587	0.0861748	1.0454	3.34882	cyp2r1	cytochrome P450 family 2 subfamily R member 1	3
ENSDARG00000101540	2.84512e-06	1.29283	2.97601	fgf3	fibroblast growth factor 3	3
ENSDARG00000059123	0.0646594	1.01775	1.43063	plcd1a	phospholipase C delta 1	3
ENSDARG00000014673	2.33681e-06	-1.08972	2.16983	fzd9b	frizzled class receptor 9	3
ENSDARG00000030871	6.76074e-05	1.2003	2.19873	siah1	siah E3 ubiquitin protein ligase 1	3
ENSDARG00000063922	0.00574076	1.18886	1.91544	mt-nd6	mitochondrially encoded NADH:ubiquinone oxidoreductase core subunit 6	3
ENSDARG00000095288	0.0489464	-1.05661	1.31248	rusc2	RUN and SH3 domain containing 2	3
ENSDARG00000061045	0.0901852	1.2133	3.1707	KBTBD13	kelch repeat and BTB (POZ) domain containing 13	3
ENSDARG00000013863	0.00399825	-1.00817	1.85143	fam133b	family with sequence similarity 133 member A	3
ENSDARG00000069450	0.0130591	1.34206	1.6611	cx41.8	gap junction protein alpha 5	3
ENSDARG00000102096	0.0265778	1.36116	1.84815	adra2b	adrenoceptor alpha 2B	3
ENSDARG00000101705	6.72219e-07	1.10511	7.88852	CR388047.1		3
ENSDARG00000099885	0.00138835	-1.12757	2.15515	trim105	tripartite motif containing 105	3
ENSDARG00000092448	0.00901639	-1.39556	4.00617	si:dkey-220o10.1		3
ENSDARG00000101029	0.0124884	1.15115	1.89316	si:ch73-347e22.4		3
ENSDARG00000090346	0.0301857	-1.07764	2.12816	CT574587.1		3
ENSDARG00000073944	0.0313276	1.04167	1.98814	si:ch73-386h18.1		3
ENSDARG00000077414	0.0343743	1.22149	2.05333	zgc:194312		3
ENSDARG00000091595	0.0715985	-1.24503	1.91444	CABZ01079490.1		3
ENSDARG00000093656	0.0812512	-1.07668	7.04122	si:dkeyp-2e4.6		3
ENSDARG00000087832	0.0708602	-1.04523	3.89867	bcl3	B-cell CLL/lymphoma 3	4
ENSDARG00000010478	0.0415756	1.71269	1.69622	hsp90aa1.1	Heat shock protein 90, alpha (cytosolic), class A member 1, tandem duplicate 1	4
ENSDARG00000006011	0.0785446	1.21461	3.12612	klhl42	kelch like family member 42	4
ENSDARG00000054968	0.0517232	1.2086	1.81156	cd40	CD40 molecule, TNF receptor superfamily member 5	4
ENSDARG00000045979	0.0419116	-1.17766	3.24662	PTGDS	prostaglandin D2 synthase	4
ENSDARG00000076594	0.0160802	1.07895	1.56023	pcdh12	protocadherin 12	4
ENSDARG00000042824	0.0409116	1.07073	1.35839	nfe2l2a	nuclear factor, erythroid 2 like 2	4
ENSDARG00000022718	0.0226656	1.29364	1.84535	casp8ap2	caspase 8 associated protein 2	4
ENSDARG00000098408	0.0970586	1.44438	1.63965	stbd1	starch binding domain 1	4
ENSDARG00000045127	0.055146	1.53477	1.82065	FAM53C	family with sequence similarity 53 member C	4
ENSDARG00000054031	0.0544282	-1.07709	1.429	mxd4	MAX dimerization protein 4	4
ENSDARG00000036893	0.0395107	1.4455	1.61048	f13a1b	coagulation factor XIII, A1 polypeptide	4
ENSDARG00000091650	0.0410166	-1.07236	1.64905	igflr1	IGF like family receptor 1	4
ENSDARG00000057921	0.0935442	1.30665	2.36166	ccdc136b	coiled-coil domain containing 136	4
ENSDARG00000022000	0.050041	1.28276	1.91482	traf3	TNF receptor associated factor 3	4
ENSDARG00000087020	0.00810065	1.04268	1.73013	si:ch73-334d15.2		4
ENSDARG00000017388	0.0742014	1.20804	1.37241	gstt1b	glutathione S-transferase theta 2B (gene/pseudogene)	4
ENSDARG00000104277	0.0742014	-1.02508	3.12845	CNTN6	contactin 6	4
ENSDARG00000061030	0.00372792	1.12344	5.94975	vezf1b	vascular endothelial zinc finger 1	4
ENSDARG00000012395	0.0714256	1.61004	4.43887	mmp13a	Matrix metallopeptidase 13a	4
ENSDARG00000054619	0.0566936	-1.42259	2.57299	fras1	Fraser extracellular matrix complex subunit 1	4
ENSDARG00000014180	0.0487509	1.01383	1.78871	ildr2	immunoglobulin-like domain containing receptor 2	4
ENSDARG00000057231	0.000516548	1.47943	2.04021	rorca	RAR-related orphan receptor C a	4
ENSDARG00000074335	0.0195539	-1.11557	1.58741	boc	BOC cell adhesion associated, oncogene regulated	4
ENSDARG00000019564	0.037697	1.15072	2.21049	asap2b	ArfGAP with SH3 domain, ankyrin repeat and PH domain 2b	4
ENSDARG00000021352	0.054171	-1.32146	3.90073	gria1a	glutamate receptor, ionotropic, AMPA 1	4
ENSDARG00000003109	0.0679562	-1.16741	1.32299	rcan1a	regulator of calcineurin 1	4
ENSDARG00000101482	0.061223	-1.08592	2.71266	hk2	hexokinase 2	4
ENSDARG00000015273	0.0658337	1.09009	3.79376	alpi.1	Alkaline phosphatase, intestinal, tandem duplicate 1	4
ENSDARG00000063509	0.0861871	1.23926	1.97866	lrrc58b	leucine rich repeat containing 58	4
ENSDARG00000052330	0.0234593	-1.11869	2.40455	slc4a2b	solute carrier family 4 (anion exchanger), member 2	4
ENSDARG00000029124	0.0160082	1.05547	1.96721	adamts15a	ADAM metallopeptidase with thrombospondin type 1 motif 15	4
ENSDARG00000101214	0.0785446	1.12588	2.26144	PKD1L3	Polycystic kidney disease 1 like 2b	4
ENSDARG00000079702	0.0662096	1.06124	1.3891	wdr81	WD repeat domain 81	4
ENSDARG00000036055	0.0494809	1.03088	2.17378	thap11	THAP domain containing 11	4
ENSDARG00000052164	0.00375362	1.35822	3.59024	znf507	zinc finger protein 507	4
ENSDARG00000025672	0.0160082	-1.86354	3.15417	antxr1a	anthrax toxin receptor 1	4
ENSDARG00000087657	0.0670777	1.19219	1.68821	fasn	fatty acid synthase	4
ENSDARG00000071871	0.0273045	-1.31818	3.57897	glod5	glyoxalase domain containing 5	4
ENSDARG00000088123	0.00154094	1.11616	2.10793	ZNF217	zinc finger protein 217	4
ENSDARG00000062040	0.0343743	1.11437	1.44037	atp8b5a	ATPase, class I, type 8B, member 5a	4
ENSDARG00000074527	0.00490106	1.45104	2.02152	chst15	carbohydrate (N-acetylgalactosamine 4-sulfate 6-O) sulfotransferase 15	4
ENSDARG00000058160	0.00722878	-1.25534	5.81418	tnfaip2b	TNF alpha induced protein 2	4
ENSDARG00000057606	0.0914281	1.10038	4.75568	arl4ca	ADP ribosylation factor like GTPase 4C	4
ENSDARG00000042929	0.0430767	1.3899	1.60693	tmem120b	transmembrane protein 120B	4
ENSDARG00000016774	0.0240742	-1.04207	1.33714	plekho2	pleckstrin homology domain containing O2	4
ENSDARG00000043237	0.000790887	1.42417	2.16423	nfil3-2	nuclear factor, interleukin 3 regulated, member 2	4
ENSDARG00000104641	0.00241535	-1.00396	2.74542	si:ch211-261d7.6		4
ENSDARG00000093126	0.00251514	-1.02078	2.66001	si:ch73-112l6.1		4
ENSDARG00000094362	0.0030913	1.38997	1.93648	si:dkey-162b3.5		4
ENSDARG00000042492	0.00398093	1.07704	2.91803	si:dkey-250d21.1		4
ENSDARG00000022952	0.00882423	1.21381	2.10834	zgc:66448		4
ENSDARG00000070604	0.00978045	1.04728	2.05583	zgc:162509		4
ENSDARG00000097247	0.0128702	1.20811	214.175	si:dkey-19d21.2		4
ENSDARG00000040503	0.0171723	1.01219	1.77334	CABZ01070258.1		4
ENSDARG00000100669	0.021121	3.08581	10.683	TRIM14		4
ENSDARG00000093048	0.0213784	-1.29175	2.67925	si:ch211-158d24.4		4
ENSDARG00000097466	0.0233195	1.91524	2.28815	si:ch211-285e16.9		4
ENSDARG00000021184	0.0234593	1.10649	1.38921	rbfox1l	RNA binding protein, fox-1 homolog (C. elegans) 1-like	4
ENSDARG00000102712	0.0258531	1.08834	1.99896	si:ch211-71k24.7		4
ENSDARG00000090015	0.0344674	1.12467	8.70801	BX321875.1		4
ENSDARG00000069019	0.038418	-1.05473	5.3103	BX004816.2		4
ENSDARG00000075048	0.0394826	1.45615	1.67499	lonrf1	LON peptidase N-terminal domain and ring finger 1	4
ENSDARG00000086626	0.0424025	1.17574	2.51142	im:7147486		4
ENSDARG00000099819	0.0481438	-1.36192	13.4573	sb:cb1058		4
ENSDARG00000100294	0.0538339	1.48626	2.60618	zgc:113209		4
ENSDARG00000053792	0.0556449	1.0889	2.83213	si:rp71-1g18.1		4
ENSDARG00000015065	0.068652	-1.17304	1.87107	c4	Complement component 4	4
ENSDARG00000076332	0.0715985	-1.35431	1.76945	si:ch211-159i8.4		4
ENSDARG00000052074	0.0759769	1.16494	2.25284	zmp:0000001085		4
ENSDARG00000070800	0.0759769	-1.1185	2.03139	zgc:109744		4
ENSDARG00000097738	0.0776617	-1.07143	1.9518	si:dkey-31n5.4		4
ENSDARG00000099680	0.0956157	1.12477	1.86777	si:dkey-15n5.6		4
ENSDARG00000096273	0.0994907	1.60097	5.94423	si:dkey-3n22.9		4
