# Supplementary material for: Physiological Responses to Swimming-Induced Exercise in the Adult Zebrafish Regenerating Heart
Source: Front Physiol. 2018 Oct 1;9:1362. doi: 10.3389/fphys.2018.01362 (PMC6174316; doi:10.3389/fphys.2018.01362)
Supplement: Supplementary file 2 [file Table_2.xlsx]

## Sheet: ClueGO Results
Table S2. List of significant GO Biological Processes (P<0.05) and the associated genes found using ClueGO.
GOID	GOTerm	Ontology Source	Term PValue	Term PValue Corrected with Bonferroni step down	Group PValue	Group PValue Corrected with Bonferroni step down	GOLevels	GOGroups	% Associated Genes	Nr. Genes	Associated Genes Found
GO:2000737	negative regulation of stem cell differentiation	GO_BiologicalProcess-GOA_23.02.2017_10h01	7.1e-05	0.03	7.1e-05	0.00021	[4, 5, 6, 7]	Group00	25	5	[CDK13, HES1, NFE2L2, PRICKLE1, ZFP36L2]
GO:0003300	cardiac muscle hypertrophy	GO_BiologicalProcess-GOA_23.02.2017_10h01	3.7e-05	0.016	3.7e-05	0.00015	[6]	Group01	12.5	9	[AGTR2, AKAP13, AKAP6, ATP2A2, HAND2, INPP5F, KLF15, TCAP, TRIM63]
GO:0009896	positive regulation of catabolic process	GO_BiologicalProcess-GOA_23.02.2017_10h01	3.3e-05	0.014	3.3e-05	0.00016	[3, 4, 5]	Group02	5.65611	25	[ABCD2, CDKN1B, CSNK1D, DAB2, DNAJB2, FBXW7, HIF1A, HK2, IRS1, MYLIP, NFE2L2, PARK7, PRICKLE1, PRKCE, RNF14, RNF144A, SMAD7, SPTLC2, TIPARP, TOB1, TRIB2, TRIM13, TRIM8, UBA52, ZFP36L2]
GO:0030182	neuron differentiation	GO_BiologicalProcess-GOA_23.02.2017_10h01	2.1e-05	0.0094	2.1e-05	0.00013	[5, 7, 8]	Group03	4.12603	55	[ACSL4, ADORA2A, ADRA2B, ARF6, B3GNT2, BCL6, BOC, CHD5, CNTN6, CSNK1D, DCLK1, DDIT4, DDX6, EEF2K, FARP2, FOXO3, FZD10, FZD5, FZD9, HAND2, HDAC9, HES1, HIF1A, IFRD1, IGSF9, INPP5F, KEL, LDB1, METRN, NAGLU, NFE2L2, NOTCH3, NR2F6, NR4A2, NUMB, PCDH12, PIGT, RERE, RHOA, RND1, RPL24, RUNX1, SALL1, SDK1, SDK2, SEMA3A, SETX, SHC1, SIAH1, SKIL, SSH2, STX3, SUFU, TCF12, ULK2]
GO:0034504	protein localization to nucleus	GO_BiologicalProcess-GOA_23.02.2017_10h01	0.0001	0.046	0.0001	0.0001	[6]	Group04	5.61225	22	[AGTR2, AKAP6, BAG3, BCL3, BCL6, CCT2, DAB2, DCLK1, DYRK2, HES1, MXI1, OSBPL8, PARK7, PPP1R10, PRICKLE1, RERE, RHOA, SUFU, TOB1, TRIM29, TRIM8, TXNIP]
GO:0040013	negative regulation of locomotion	GO_BiologicalProcess-GOA_23.02.2017_10h01	7.4e-05	0.031	7.4e-05	0.00014	[2, 3, 4]	Group05	6.4982	18	[ABHD2, ABR, ADORA2A, AGTR2, ARRDC3, CITED2, CYP1B1, FAM60A, IGFBP3, NFE2L2, OSBPL8, PKP2, RAP2C, RHOA, SEMA3A, SMAD7, TRIM13, TRIM8]
GO:0070482	response to oxygen levels	GO_BiologicalProcess-GOA_23.02.2017_10h01	1.2e-05	0.0053	1.2e-05	9.7e-05	[3]	Group06	6.15385	24	[ALKBH5, CDKN1B, CITED2, CPEB4, DDIT4, EDNRA, EEF2K, EGLN3, EGR1, FASN, FOXO3, GNB1, HIF1A, HIF3A, LOXL2, NFE2L2, NR4A2, PCK1, PRKCE, RAF1, RAMP2, UBA52, UBE2D2, UCP2]
GO:0001666	response to hypoxia	GO_BiologicalProcess-GOA_23.02.2017_10h01	9.5e-05	0.04	1.2e-05	9.7e-05	[3, 5]	Group06	5.81717	21	[ALKBH5, CDKN1B, CITED2, DDIT4, EDNRA, EGLN3, EGR1, FOXO3, GNB1, HIF1A, HIF3A, LOXL2, NFE2L2, NR4A2, PCK1, PRKCE, RAF1, RAMP2, UBA52, UBE2D2, UCP2]
GO:0042752	regulation of circadian rhythm	GO_BiologicalProcess-GOA_23.02.2017_10h01	6.5e-07	0.00029	6.5e-07	6.5e-06	[2, 3]	Group07	12.6214	13	[ADORA2A, CIPC, CRY1, CSNK1D, FBXL3, NOCT, NR1D2, NR2F6, PER2, PPP1CA, PTGDS, RORC, USP2]
GO:0043153	entrainment of circadian clock by photoperiod	GO_BiologicalProcess-GOA_23.02.2017_10h01	7.1e-05	0.03	6.5e-07	6.5e-06	[4, 5, 6]	Group07	25	5	[CRY1, FBXL3, NR2F6, PPP1CA, USP2]
GO:0070647	protein modification by small protein conjugation or removal	GO_BiologicalProcess-GOA_23.02.2017_10h01	1.2e-05	0.0056	1.2e-05	8.9e-05	[6, 7]	Group08	4.37063	50	[ARRDC3, ASB2, ASXL1, BMI1, CISH, CRY1, DNAJB2, DTX3, EGR1, FBXL3, FBXO40, FBXW7, HDAC9, HIF1A, HSP90AA1, KBTBD13, KLHL34, KLHL42, MYLIP, NFE2L2, PARK7, PELI1, PER2, PRICKLE1, PRKCE, RHOA, RNF123, RNF14, RNF144A, SIAH1, SMAD1, SMAD7, SOCS2, SPOPL, SUFU, SUZ12, TRAF3, TRIM13, TRIM63, TRIM69, TRIM8, TTC3, UBA52, UBE2D2, UBE2J2, UBE2Q2, USP2, USP42, VCPIP1, XIAP]
GO:0032446	protein modification by small protein conjugation	GO_BiologicalProcess-GOA_23.02.2017_10h01	4.5e-06	0.002	1.2e-05	8.9e-05	[7, 8]	Group08	4.73628	44	[ARRDC3, ASB2, BMI1, CISH, CRY1, DNAJB2, DTX3, EGR1, FBXL3, FBXO40, FBXW7, HDAC9, HSP90AA1, KBTBD13, KLHL34, KLHL42, MYLIP, NFE2L2, PARK7, PELI1, PER2, PRICKLE1, PRKCE, RNF123, RNF14, RNF144A, SIAH1, SMAD7, SOCS2, SPOPL, SUFU, SUZ12, TRAF3, TRIM13, TRIM63, TRIM69, TRIM8, TTC3, UBA52, UBE2D2, UBE2J2, UBE2Q2, VCPIP1, XIAP]
GO:0016567	protein ubiquitination	GO_BiologicalProcess-GOA_23.02.2017_10h01	2.1e-06	0.00098	1.2e-05	8.9e-05	[8, 9]	Group08	5.01193	42	[ARRDC3, ASB2, BMI1, CISH, CRY1, DNAJB2, DTX3, FBXL3, FBXO40, FBXW7, HSP90AA1, KBTBD13, KLHL34, KLHL42, MYLIP, NFE2L2, PARK7, PELI1, PER2, PRICKLE1, PRKCE, RNF123, RNF14, RNF144A, SIAH1, SMAD7, SOCS2, SPOPL, SUFU, SUZ12, TRAF3, TRIM13, TRIM63, TRIM69, TRIM8, TTC3, UBA52, UBE2D2, UBE2J2, UBE2Q2, VCPIP1, XIAP]
GO:0051093	negative regulation of developmental process	GO_BiologicalProcess-GOA_23.02.2017_10h01	4.7e-06	0.0021	3.8e-07	4.2e-06	[2, 3, 4]	Group09	4.80984	43	[ABR, ARF6, ASXL1, BCL6, BHLHE41, CDK13, CDKN1B, CXCL14, DDX6, FBXW7, FGF3, FOXO3, FZD9, HAND2, HDAC9, HES1, HIF1A, IFRD1, INPP5F, KLF13, LDB1, LUC7L, NFE2L2, NMRK2, NOCT, NOTCH3, NRARP, PKP2, PRICKLE1, RARG, RCAN1, RHOA, RPS6KA6, RUNX1, SEMA3A, SKIL, SMAD7, SUFU, SUZ12, TOB1, TRIB2, ULK2, ZFP36L2]
GO:0045595	regulation of cell differentiation	GO_BiologicalProcess-GOA_23.02.2017_10h01	4.5e-07	0.0002	3.8e-07	4.2e-06	[3, 4, 5]	Group09	4.26189	69	[ADRA2B, AKAP13, AKAP6, ARF6, ASXL1, BCL6, BHLHE41, BOC, BTC, CCNT2, CDK13, CDKN1B, CSNK1D, CXCL14, CYR61, DAB2, DDX6, EEF2K, FASN, FNIP1, FOXO3, FZD9, HAND2, HDAC9, HES1, HIF1A, IFRD1, IGFBP3, INPP5F, KEL, KLF13, LDB1, LOXL2, MAF, METRN, NFE2L2, NMRK2, NOCT, NOTCH3, NR1D2, NRARP, NUMB, PER2, PHLDB1, PKDCC, PKP2, PRICKLE1, RAF1, RAMP2, RARG, RCAN1, RHOA, RORC, RUNX1, SDK1, SEMA3A, SETX, SKIL, SMA…
GO:0045596	negative regulation of cell differentiation	GO_BiologicalProcess-GOA_23.02.2017_10h01	7.1e-06	0.0031	3.8e-07	4.2e-06	[3, 4, 5, 6]	Group09	5.24738	35	[ARF6, ASXL1, BCL6, BHLHE41, CDK13, CXCL14, DDX6, FOXO3, HAND2, HDAC9, HES1, IFRD1, INPP5F, KLF13, LDB1, NFE2L2, NMRK2, NOCT, NOTCH3, NRARP, PKP2, PRICKLE1, RARG, RCAN1, RHOA, RUNX1, SEMA3A, SKIL, SMAD7, SUFU, SUZ12, TOB1, TRIB2, ULK2, ZFP36L2]
GO:0061061	muscle structure development	GO_BiologicalProcess-GOA_23.02.2017_10h01	7.5e-07	0.00034	1.1e-09	1.6e-08	[3]	Group10	5.69106	35	[AGTR2, AKAP13, AKAP6, ASB2, ATP2A2, BHLHE41, BOC, CCNT2, CXCL14, EGR1, FBXO40, FGF3, H3F3B, HDAC9, HEG1, HES1, IFRD1, IGFBP3, JPH1, KDM6B, KEL, LUC7L, MYBPH, MYH7B, NMRK2, NR1D2, PKP2, PRICKLE1, RAMP2, RCAN1, SKIL, SMAD7, TCAP, TCF12, USP2]
GO:0060537	muscle tissue development	GO_BiologicalProcess-GOA_23.02.2017_10h01	7.9e-06	0.0034	1.1e-09	1.6e-08	[4]	Group10	6.31579	24	[AGTR2, AKAP13, AKAP6, ASB2, CCNT2, EGR1, FGF3, GJA5, HDAC9, HEG1, IFRD1, KDM6B, KEL, LUC7L, MYH7B, NR1D2, PKP2, RCAN1, SKIL, SMAD1, SMAD7, TCAP, TIPARP, ZFAND5]
GO:0007507	heart development	GO_BiologicalProcess-GOA_23.02.2017_10h01	3.2e-05	0.013	1.1e-09	1.6e-08	[3, 4, 5, 6]	Group10	5.26316	29	[ADIPOR2, AGTR2, AKAP13, AKAP6, ASXL1, CAD, CITED2, CYR61, EDNRA, ERG, FGF3, GJA5, HAND2, HDAC9, HEG1, HES1, HIF1A, KDM6B, PKP2, PRICKLE1, RAF1, RAMP2, SALL1, SHC1, SMAD1, SMAD6, SMAD7, SUFU, TCAP]
GO:0042692	muscle cell differentiation	GO_BiologicalProcess-GOA_23.02.2017_10h01	2.7e-05	0.011	1.1e-09	1.6e-08	[4, 5]	Group10	6.00522	23	[AGTR2, AKAP13, AKAP6, ASB2, ATP2A2, BHLHE41, BOC, CCNT2, CXCL14, FBXO40, H3F3B, HDAC9, HES1, IFRD1, IGFBP3, KDM6B, KEL, MYBPH, NMRK2, PRICKLE1, RAMP2, RCAN1, TCAP]
GO:0014706	striated muscle tissue development	GO_BiologicalProcess-GOA_23.02.2017_10h01	3.8e-05	0.016	1.1e-09	1.6e-08	[5]	Group10	6.0274	22	[AGTR2, AKAP13, AKAP6, ASB2, CCNT2, EGR1, FGF3, GJA5, HDAC9, HEG1, IFRD1, KDM6B, KEL, LUC7L, MYH7B, NR1D2, PKP2, RCAN1, SKIL, SMAD1, SMAD7, TCAP]
GO:0044262	cellular carbohydrate metabolic process	GO_BiologicalProcess-GOA_23.02.2017_10h01	1.4e-05	0.0061	9.2e-06	8.3e-05	[3, 4]	Group11	6.84932	20	[B3GNT2, DDIT4, DYRK2, GYG2, HK2, IGFBP3, IRS1, MAP4K2, MIDN, PCDH12, PCK1, PER2, PPP1CA, PPP1R3A, PPP1R3C, PPP1R3G, PRKCE, RORC, STBD1, UBA52]
GO:0005976	polysaccharide metabolic process	GO_BiologicalProcess-GOA_23.02.2017_10h01	3.7e-07	0.00017	9.2e-06	8.3e-05	[4]	Group11	12.1739	14	[B3GNT2, CHST1, DYRK2, GYG2, IRS1, MAP4K2, PCDH12, PER2, PPP1CA, PPP1R3A, PPP1R3C, PPP1R3G, STBD1, UBA52]
GO:0034637	cellular carbohydrate biosynthetic process	GO_BiologicalProcess-GOA_23.02.2017_10h01	5.8e-06	0.0025	9.2e-06	8.3e-05	[3, 4, 5, 6]	Group11	12.3596	11	[B3GNT2, DYRK2, GYG2, IRS1, MAP4K2, PCK1, PER2, PPP1CA, PPP1R3C, PPP1R3G, UBA52]
GO:0005977	glycogen metabolic process	GO_BiologicalProcess-GOA_23.02.2017_10h01	3e-07	0.00013	9.2e-06	8.3e-05	[4, 5, 6, 7]	Group11	14.8148	12	[DYRK2, GYG2, IRS1, MAP4K2, PCDH12, PER2, PPP1CA, PPP1R3A, PPP1R3C, PPP1R3G, STBD1, UBA52]
GO:0005978	glycogen biosynthetic process	GO_BiologicalProcess-GOA_23.02.2017_10h01	3.9e-06	0.0017	9.2e-06	8.3e-05	[5, 6, 7, 8, 9]	Group11	16.3636	9	[DYRK2, GYG2, IRS1, MAP4K2, PER2, PPP1CA, PPP1R3C, PPP1R3G, UBA52]
GO:0007507	heart development	GO_BiologicalProcess-GOA_23.02.2017_10h01	3.2e-05	0.013	3.1e-09	4.4e-08	[3, 4, 5, 6]	Group12	5.26316	29	[ADIPOR2, AGTR2, AKAP13, AKAP6, ASXL1, CAD, CITED2, CYR61, EDNRA, ERG, FGF3, GJA5, HAND2, HDAC9, HEG1, HES1, HIF1A, KDM6B, PKP2, PRICKLE1, RAF1, RAMP2, SALL1, SHC1, SMAD1, SMAD6, SMAD7, SUFU, TCAP]
GO:0072359	circulatory system development	GO_BiologicalProcess-GOA_23.02.2017_10h01	3.2e-07	0.00015	3.1e-09	4.4e-08	[4, 5]	Group12	4.9456	50	[ADIPOR2, AGTR2, AIMP1, AKAP13, AKAP6, ANTXR1, ASXL1, CAD, CITED2, CYP1B1, CYR61, EDNRA, EGR1, ERG, FBXW7, FGF1, FGF3, FLT1, FZD5, GJA5, HAND2, HDAC9, HEG1, HES1, HIF1A, HIF3A, KDM6B, LOXL2, NFE2L2, NOTCH3, NRARP, PKP2, PLCD1, PRICKLE1, RAF1, RAMP2, RHOA, RUNX1, SALL1, SHC1, SMAD1, SMAD6, SMAD7, SUFU, TCAP, TIPARP, TNFAIP2, UBP1, VEZF1, ZFAND5]
GO:0014706	striated muscle tissue development	GO_BiologicalProcess-GOA_23.02.2017_10h01	3.8e-05	0.016	3.1e-09	4.4e-08	[5]	Group12	6.0274	22	[AGTR2, AKAP13, AKAP6, ASB2, CCNT2, EGR1, FGF3, GJA5, HDAC9, HEG1, IFRD1, KDM6B, KEL, LUC7L, MYH7B, NR1D2, PKP2, RCAN1, SKIL, SMAD1, SMAD7, TCAP]
GO:0001568	blood vessel development	GO_BiologicalProcess-GOA_23.02.2017_10h01	3.3e-06	0.0015	3.1e-09	4.4e-08	[3, 5, 6, 7, 8]	Group12	5.44	34	[ADIPOR2, AIMP1, ANTXR1, CYP1B1, CYR61, EDNRA, EGR1, FGF1, FLT1, FZD5, GJA5, HAND2, HDAC9, HEG1, HES1, HIF1A, HIF3A, LOXL2, NFE2L2, NOTCH3, NRARP, PLCD1, PRICKLE1, RAMP2, RHOA, RUNX1, SHC1, SMAD6, SMAD7, SUFU, TIPARP, TNFAIP2, UBP1, VEZF1]
GO:0003231	cardiac ventricle development	GO_BiologicalProcess-GOA_23.02.2017_10h01	2.3e-05	0.01	3.1e-09	4.4e-08	[4, 5, 6, 7, 8]	Group12	9.83607	12	[CITED2, CYR61, GJA5, HAND2, HEG1, HES1, HIF1A, PKP2, SALL1, SMAD6, SMAD7, SUFU]
GO:0003281	ventricular septum development	GO_BiologicalProcess-GOA_23.02.2017_10h01	1.6e-05	0.0071	3.1e-09	4.4e-08	[4, 5, 6, 7, 8, 9]	Group12	13.8462	9	[CITED2, CYR61, GJA5, HEG1, HES1, SALL1, SMAD6, SMAD7, SUFU]
GO:0071495	cellular response to endogenous stimulus	GO_BiologicalProcess-GOA_23.02.2017_10h01	2.6e-08	1.2e-05	6.9e-08	8.3e-07	[3]	Group13	4.75831	63	[ABHD2, ADIPOR2, AGTR2, AKAP13, AKAP6, CAD, CISH, CITED2, COL16A1, CPEB4, CRY1, CSNK1D, CYR61, DAB2, DDIT4, EEF2K, EGR1, FGF1, FGF17, FGF3, FOXO3, GNB1, GNG2, HDAC9, HES1, IGFBP7, IRS1, KLF1, KLF15, KLF2, KMT2D, MAP4K2, MAX, NR1D2, NR2F6, NR4A2, NRIP1, OSBPL8, PARK7, PCK1, PIK3R3, PRKCE, RAD51, RAMP2, RARG, RHOA, RNF14, RORC, SETX, SHC1, SIK2, SKIL, SMAD1, SMAD6, SMAD7, SNX6, SOCS2, SRSF5, TOB1, …
GO:0009725	response to hormone	GO_BiologicalProcess-GOA_23.02.2017_10h01	2.7e-06	0.0012	6.9e-08	8.3e-07	[3, 4]	Group13	4.78723	45	[ABHD2, ADIPOR2, AGTR2, AKAP13, CAD, CDKN1B, CISH, CRY1, DAB2, DDIT4, EEF2K, EGR1, FASN, FOXO3, GNB1, GNG2, H3F3B, HDAC9, IGFBP7, IRS1, KMT2D, MAP4K2, MAX, NR1D2, NR2F6, NR4A2, NRIP1, OSBPL8, PARK7, PCK1, PIK3R3, PRKCE, RAMP2, RARG, RNF14, RORC, SHC1, SIK2, SLC26A5, SOCS2, SRSF5, TRIM63, TXNIP, UCP2, ZFP36L2]
GO:0014070	response to organic cyclic compound	GO_BiologicalProcess-GOA_23.02.2017_10h01	1.3e-05	0.0057	6.9e-08	8.3e-07	[4]	Group13	4.47036	46	[ABHD2, ADORA2A, AGTR2, AKAP13, AKAP6, CAD, CD40, CDKN1B, CRY1, CYP1B1, DAB2, DDIT4, EEF2K, EGR1, FASN, FOXO3, GNB1, GNG2, HLCS, IGFBP7, IVNS1ABP, KLF2, KMT2D, ND6, NR1D2, NR2F6, NR4A2, NRIP1, PARK7, PCK1, PELI1, PRKCE, RAD51, RAMP2, RARG, RNF14, RORC, SDK1, SLC26A5, SLC3A2, SMAD1, SOCS2, TIPARP, TRIM63, TXNIP, ZFP36L2]
GO:0032870	cellular response to hormone stimulus	GO_BiologicalProcess-GOA_23.02.2017_10h01	1.5e-06	0.00071	6.9e-08	8.3e-07	[4, 5]	Group13	5.36232	37	[ABHD2, ADIPOR2, AGTR2, AKAP13, CISH, CRY1, DAB2, DDIT4, EEF2K, FOXO3, GNB1, GNG2, HDAC9, IGFBP7, IRS1, KMT2D, MAP4K2, MAX, NR1D2, NR2F6, NR4A2, NRIP1, OSBPL8, PARK7, PCK1, PIK3R3, PRKCE, RAMP2, RARG, RNF14, RORC, SHC1, SIK2, SOCS2, SRSF5, UCP2, ZFP36L2]
GO:1901652	response to peptide	GO_BiologicalProcess-GOA_23.02.2017_10h01	4.6e-05	0.019	6.9e-08	8.3e-07	[4, 5]	Group13	5.37849	27	[AGTR2, CAD, CD40, CDKN1B, CISH, CRY1, EEF2K, EGR1, FOXO3, GNB1, GNG2, HDAC9, IRS1, KLF1, KLF15, KLF2, MAP4K2, MAX, NR4A2, OSBPL8, PCK1, PIK3R3, SHC1, SIK2, SOCS2, SRSF5, UCP2]
GO:1901653	cellular response to peptide	GO_BiologicalProcess-GOA_23.02.2017_10h01	2.7e-05	0.011	6.9e-08	8.3e-07	[5, 6]	Group13	6.16247	22	[AGTR2, CISH, EEF2K, FOXO3, GNB1, GNG2, HDAC9, IRS1, KLF1, KLF15, KLF2, MAP4K2, MAX, NR4A2, OSBPL8, PCK1, PIK3R3, SHC1, SIK2, SOCS2, SRSF5, UCP2]
GO:0048646	anatomical structure formation involved in morphogenesis	GO_BiologicalProcess-GOA_23.02.2017_10h01	5.4e-07	0.00024	4.2e-08	5.5e-07	[2, 3, 4]	Group14	4.8216	50	[ADIPOR2, AIMP1, AKAP13, BCL3, BCL6, CCDC136, CITED2, CYP1B1, CYR61, DUSP2, EDNRA, ERG, FGF1, FLT1, FZD5, FZD9, GJA5, HAND2, HDAC9, HES1, HIF1A, HIF3A, IRX1, IRX2, KDM6B, LDB1, LOXL2, MYBPH, NFE2L2, NFKB2, NOTCH3, NRARP, PHLDB1, PLCD1, PRICKLE1, RAMP2, RARG, RHOA, RUNX1, SALL1, SDK1, SDK2, SHC1, SKIL, SMAD1, SUFU, TCAP, TNFAIP2, UBP1, VEZF1]
GO:0007507	heart development	GO_BiologicalProcess-GOA_23.02.2017_10h01	3.2e-05	0.013	4.2e-08	5.5e-07	[3, 4, 5, 6]	Group14	5.26316	29	[ADIPOR2, AGTR2, AKAP13, AKAP6, ASXL1, CAD, CITED2, CYR61, EDNRA, ERG, FGF3, GJA5, HAND2, HDAC9, HEG1, HES1, HIF1A, KDM6B, PKP2, PRICKLE1, RAF1, RAMP2, SALL1, SHC1, SMAD1, SMAD6, SMAD7, SUFU, TCAP]
GO:0072359	circulatory system development	GO_BiologicalProcess-GOA_23.02.2017_10h01	3.2e-07	0.00015	4.2e-08	5.5e-07	[4, 5]	Group14	4.9456	50	[ADIPOR2, AGTR2, AIMP1, AKAP13, AKAP6, ANTXR1, ASXL1, CAD, CITED2, CYP1B1, CYR61, EDNRA, EGR1, ERG, FBXW7, FGF1, FGF3, FLT1, FZD5, GJA5, HAND2, HDAC9, HEG1, HES1, HIF1A, HIF3A, KDM6B, LOXL2, NFE2L2, NOTCH3, NRARP, PKP2, PLCD1, PRICKLE1, RAF1, RAMP2, RHOA, RUNX1, SALL1, SHC1, SMAD1, SMAD6, SMAD7, SUFU, TCAP, TIPARP, TNFAIP2, UBP1, VEZF1, ZFAND5]
GO:0001944	vasculature development	GO_BiologicalProcess-GOA_23.02.2017_10h01	1.2e-06	0.00054	4.2e-08	5.5e-07	[4, 5, 6, 7]	Group14	5.53846	36	[ADIPOR2, AIMP1, ANTXR1, CYP1B1, CYR61, EDNRA, EGR1, FBXW7, FGF1, FLT1, FZD5, GJA5, HAND2, HDAC9, HEG1, HES1, HIF1A, HIF3A, LOXL2, NFE2L2, NOTCH3, NRARP, PLCD1, PRICKLE1, RAMP2, RHOA, RUNX1, SHC1, SMAD6, SMAD7, SUFU, TIPARP, TNFAIP2, UBP1, VEZF1, ZFAND5]
GO:0001568	blood vessel development	GO_BiologicalProcess-GOA_23.02.2017_10h01	3.3e-06	0.0015	4.2e-08	5.5e-07	[3, 5, 6, 7, 8]	Group14	5.44	34	[ADIPOR2, AIMP1, ANTXR1, CYP1B1, CYR61, EDNRA, EGR1, FGF1, FLT1, FZD5, GJA5, HAND2, HDAC9, HEG1, HES1, HIF1A, HIF3A, LOXL2, NFE2L2, NOTCH3, NRARP, PLCD1, PRICKLE1, RAMP2, RHOA, RUNX1, SHC1, SMAD6, SMAD7, SUFU, TIPARP, TNFAIP2, UBP1, VEZF1]
GO:0048514	blood vessel morphogenesis	GO_BiologicalProcess-GOA_23.02.2017_10h01	2.2e-05	0.01	4.2e-08	5.5e-07	[3, 4, 6, 7, 8, 9]	Group14	5.38033	29	[ADIPOR2, AIMP1, CYP1B1, CYR61, EDNRA, FGF1, FLT1, FZD5, GJA5, HAND2, HDAC9, HEG1, HES1, HIF1A, HIF3A, LOXL2, NFE2L2, NOTCH3, NRARP, PLCD1, RAMP2, RHOA, RUNX1, SHC1, SMAD7, TIPARP, TNFAIP2, UBP1, VEZF1]
GO:0001525	angiogenesis	GO_BiologicalProcess-GOA_23.02.2017_10h01	7.2e-05	0.03	4.2e-08	5.5e-07	[3, 4, 5, 7, 8, 9, 10]	Group14	5.53097	25	[ADIPOR2, AIMP1, CYP1B1, CYR61, EDNRA, FGF1, FLT1, FZD5, GJA5, HAND2, HDAC9, HIF1A, HIF3A, LOXL2, NFE2L2, NOTCH3, NRARP, PLCD1, RAMP2, RHOA, RUNX1, SHC1, TNFAIP2, UBP1, VEZF1]
GO:0051172	negative regulation of nitrogen compound metabolic process	GO_BiologicalProcess-GOA_23.02.2017_10h01	1.7e-08	8.2e-06	2.2e-12	3.5e-11	[3, 4, 5]	Group15	4.52546	72	[AEBP2, AKAP6, ANTXR1, ASXL1, BAG3, BCL3, BCL6, BHLHE41, BMI1, CASP8AP2, CDKN1B, CIPC, CITED2, CPEB4, CRY1, DAB2, DDIT4, DNAJB5, DYRK1A, EDNRA, EGR1, FBXW7, FNIP1, FOXO3, HDAC9, HES1, HIC1, HIF3A, HIVEP1, KAT6B, KMT2D, LDB1, LOXL2, MAF, MXD4, MXI1, NFKB2, NOTCH3, NR1D2, NR2F6, NR4A2, NRARP, NRIP1, PARPBP, PER2, PPP1R15A, PRICKLE1, RARG, RERE, RUNX1, SALL1, SHC1, SKIL, SMAD1, SMAD7, SNX6, SUFU, SU…
GO:0051173	positive regulation of nitrogen compound metabolic process	GO_BiologicalProcess-GOA_23.02.2017_10h01	6.3e-07	0.00029	2.2e-12	3.5e-11	[3, 4, 5]	Group15	4.03518	78	[ADORA2A, AGTR2, ANTXR1, ASXL1, BCL3, BRD4, CCNT2, CCT2, CD40, CDK13, CITED2, CITED4, CREB5, CSRNP1, CYR61, DAB2, EDNRA, EGR1, ERG, EYA4, FBXW7, FGF1, FOXO3, FZD5, GMEB1, HAND2, HES1, HIF1A, HIF3A, HSP90AA1, IER5, IFRD1, KAT6B, KDM6B, KDM7A, KLF1, KLF13, KLF15, KLF2, KMT2D, LDB1, MAF, NFAT5, NFE2L2, NFKB2, NOTCH3, NR1D2, NR4A2, NRIP1, PARK7, PCK1, PPP1R15A, PPRC1, RAD51, RAF1, RAMP2, RARG, RBM3, …
GO:0010557	positive regulation of macromolecule biosynthetic process	GO_BiologicalProcess-GOA_23.02.2017_10h01	4.6e-07	0.00021	2.2e-12	3.5e-11	[4, 5, 6]	Group15	4.16905	73	[AGTR2, ANTXR1, ASXL1, BCL3, BRD4, CCNT2, CCT2, CD40, CDK13, CITED2, CITED4, CREB5, CSRNP1, CYR61, DAB2, DYRK2, EGR1, ERG, FBXW7, FGF1, FOXO3, FZD5, GMEB1, HAND2, HES1, HIF1A, HIF3A, HSP90AA1, IER5, IFRD1, IRS1, KAT6B, KDM6B, KDM7A, KLF1, KLF13, KLF15, KLF2, KMT2D, LDB1, MAF, MAP4K2, NFAT5, NFE2L2, NFKB2, NOTCH3, NR1D2, NR4A2, NRIP1, PARK7, PCK1, PPP1R15A, PPP1R3G, PPRC1, RAF1, RARG, RBM3, RERE, …
GO:0010558	negative regulation of macromolecule biosynthetic process	GO_BiologicalProcess-GOA_23.02.2017_10h01	2.4e-08	1.1e-05	2.2e-12	3.5e-11	[4, 5, 6]	Group15	4.629	68	[AEBP2, ANTXR1, ASXL1, BAG3, BCL3, BCL6, BHLHE41, BMI1, CASP8AP2, CDKN1B, CIPC, CITED2, CPEB4, CRY1, DAB2, DNAJB5, EGR1, FBXW7, FNIP1, FOXO3, HDAC9, HES1, HIC1, HIF3A, HIVEP1, KAT6B, KMT2D, LDB1, LOXL2, MAF, MXD4, MXI1, NFKB2, NOTCH3, NR1D2, NR2F6, NR4A2, NRARP, NRIP1, PER2, PPP1R15A, PRICKLE1, RARG, RERE, RUNX1, SALL1, SHC1, SKIL, SMAD1, SMAD7, SNX6, SUFU, SUZ12, THAP11, TOB1, TRIB2, TRIM13, TRI…
GO:0010629	negative regulation of gene expression	GO_BiologicalProcess-GOA_23.02.2017_10h01	1.2e-08	5.9e-06	2.2e-12	3.5e-11	[4, 5, 6]	Group15	4.4586	77	[AEBP2, ASXL1, BAG3, BCL3, BCL6, BHLHE41, BMI1, CDKN1B, CHAC1, CIPC, CITED2, CPEB4, CRY1, DAB2, DDX6, DNAJB5, DYRK1A, EGR1, EIF4A1, FNIP1, FOXO3, HAND2, HDAC9, HES1, HIC1, HIVEP1, KAT6B, KMT2D, LDB1, LOXL2, MAF, MAX, MXD4, NFKB2, NOCT, NOTCH3, NR1D2, NR2F6, NR4A2, NRARP, NRIP1, PARK7, PER2, PPP1R15A, PRICKLE1, RARG, RERE, RPL18A, RPL24, RPLP2, RPS15A, RPS2, RUNX1, SALL1, SHC1, SKIL, SMAD1, SMAD7,…
GO:0031327	negative regulation of cellular biosynthetic process	GO_BiologicalProcess-GOA_23.02.2017_10h01	1.9e-08	9.1e-06	2.2e-12	3.5e-11	[4, 5, 6]	Group15	4.57474	71	[AEBP2, AKAP6, ANTXR1, ASXL1, BAG3, BCL3, BCL6, BHLHE41, BMI1, CASP8AP2, CDKN1B, CIPC, CITED2, CPEB4, CRY1, DAB2, DNAJB5, EDNRA, EGR1, FBXW7, FNIP1, FOXO3, HDAC9, HES1, HIC1, HIF3A, HIVEP1, KAT6B, KMT2D, LDB1, LOXL2, MAF, MAP4K2, MXD4, MXI1, NFKB2, NOTCH3, NR1D2, NR2F6, NR4A2, NRARP, NRIP1, PER2, PPP1R15A, PRICKLE1, RARG, RERE, RUNX1, SALL1, SHC1, SKIL, SMAD1, SMAD7, SNX6, SUFU, SUZ12, THAP11, TO…
GO:0031328	positive regulation of cellular biosynthetic process	GO_BiologicalProcess-GOA_23.02.2017_10h01	3.4e-07	0.00015	2.2e-12	3.5e-11	[4, 5, 6]	Group15	4.09449	78	[ADORA2A, AGTR2, ANTXR1, ASXL1, BCL3, BRD4, CCNT2, CCT2, CD40, CDK13, CITED2, CITED4, CREB5, CSRNP1, CYR61, DAB2, DYRK2, EDNRA, EGR1, ERG, FBXW7, FGF1, FOXO3, FZD5, GMEB1, HAND2, HES1, HIF1A, HIF3A, HSP90AA1, IER5, IFRD1, IRS1, KAT6B, KDM6B, KDM7A, KLF1, KLF13, KLF15, KLF2, KMT2D, LDB1, MAF, MAP4K2, MID1IP1, NFAT5, NFE2L2, NFKB2, NOTCH3, NR1D2, NR4A2, NRIP1, PARK7, PCK1, PPP1R15A, PPP1R3G, PPRC1,…
GO:0045934	negative regulation of nucleobase-containing compound metabolic process	GO_BiologicalProcess-GOA_23.02.2017_10h01	3.4e-09	1.6e-06	2.2e-12	3.5e-11	[4, 5, 6]	Group15	4.78834	69	[AEBP2, AKAP6, ANTXR1, ASXL1, BAG3, BCL3, BCL6, BHLHE41, BMI1, CASP8AP2, CDKN1B, CIPC, CITED2, CRY1, DAB2, DDIT4, DNAJB5, DYRK1A, EDNRA, EGR1, FBXW7, FNIP1, FOXO3, HDAC9, HES1, HIC1, HIF3A, HIVEP1, KAT6B, KMT2D, LDB1, LOXL2, MAF, MXD4, MXI1, NFKB2, NOTCH3, NR1D2, NR2F6, NR4A2, NRARP, NRIP1, PARPBP, PER2, PPP1R15A, PRICKLE1, RARG, RERE, RUNX1, SALL1, SHC1, SKIL, SMAD7, SNX6, SUFU, SUZ12, THAP11, T…
GO:0051253	negative regulation of RNA metabolic process	GO_BiologicalProcess-GOA_23.02.2017_10h01	8e-09	3.8e-06	2.2e-12	3.5e-11	[4, 5, 6, 7, 8]	Group15	4.91803	63	[AEBP2, ASXL1, BAG3, BCL3, BCL6, BHLHE41, BMI1, CASP8AP2, CDKN1B, CIPC, CITED2, CRY1, DAB2, DNAJB5, DYRK1A, EGR1, FNIP1, FOXO3, HDAC9, HES1, HIC1, HIF3A, HIVEP1, KAT6B, KMT2D, LDB1, LOXL2, MAF, MXD4, MXI1, NFKB2, NOTCH3, NR1D2, NR2F6, NR4A2, NRARP, NRIP1, PER2, PPP1R15A, PRICKLE1, RARG, RERE, RUNX1, SALL1, SHC1, SKIL, SMAD7, SNX6, SUFU, SUZ12, THAP11, TOB1, TRIM13, TRIM29, TRIM8, TXNIP, UBA52, UB…
GO:0051254	positive regulation of RNA metabolic process	GO_BiologicalProcess-GOA_23.02.2017_10h01	1.4e-07	6.5e-05	2.2e-12	3.5e-11	[4, 5, 6, 7, 8]	Group15	4.41845	68	[AGTR2, ASXL1, BCL3, BRD4, CCNT2, CD40, CDK13, CITED2, CITED4, CREB5, CSRNP1, CYR61, DAB2, EGR1, ERG, FBXW7, FGF1, FOXO3, FZD5, GMEB1, HAND2, HES1, HIF1A, HIF3A, IER5, IFRD1, KAT6B, KDM6B, KDM7A, KLF1, KLF13, KLF15, KLF2, KMT2D, LDB1, MAF, NFAT5, NFE2L2, NFKB2, NOTCH3, NR1D2, NR4A2, NRIP1, PARK7, PCK1, PPP1R15A, PPRC1, RAF1, RARG, RERE, RNF14, RORC, RUNX1, SALL1, SERTAD2, SETX, SHC1, SMAD1, SMAD6…
GO:2000113	negative regulation of cellular macromolecule biosynthetic process	GO_BiologicalProcess-GOA_23.02.2017_10h01	2.8e-07	0.00013	2.2e-12	3.5e-11	[5, 6, 7]	Group15	4.48301	62	[AEBP2, ANTXR1, ASXL1, BAG3, BCL3, BCL6, BHLHE41, BMI1, CDKN1B, CIPC, CITED2, CPEB4, CRY1, DAB2, DNAJB5, EGR1, FBXW7, FNIP1, FOXO3, HDAC9, HES1, HIC1, HIVEP1, KAT6B, KMT2D, LDB1, LOXL2, MAF, MXD4, NFKB2, NOTCH3, NR1D2, NR2F6, NR4A2, NRARP, NRIP1, PER2, PPP1R15A, PRICKLE1, RARG, RERE, RUNX1, SALL1, SHC1, SKIL, SMAD1, SMAD7, SNX6, SUFU, SUZ12, THAP11, TOB1, TRIM29, TXNIP, UBA52, UBP1, USP2, ZBTB20,…
GO:0006366	transcription from RNA polymerase II promoter	GO_BiologicalProcess-GOA_23.02.2017_10h01	2.3e-11	1.1e-08	2.2e-12	3.5e-11	[6, 7, 8, 9, 10]	Group15	4.4898	99	[AEBP2, ASXL1, BAG3, BCL3, BCL6, BHLHE41, BMI1, BRD2, BRD4, CCNT2, CD40, CDK13, CHD5, CITED2, CITED4, CREB5, CRY1, CSRNP1, CYR61, DNAJB5, EGLN3, EGR1, ERG, FBXW7, FGF1, FNIP1, FOXO3, FZD5, GMEB1, HAND2, HDAC9, HES1, HIC1, HIF1A, HIF3A, HIVEP1, HIVEP2, IER5, IFRD1, KAT6B, KDM6B, KLF13, KLF15, KLF2, KMT2D, LDB1, MAF, MAX, MXD4, NFAT5, NFE2L2, NFKB2, NOCT, NOTCH3, NR1D2, NR2F6, NR4A2, NRARP, NRIP1, …
GO:0045892	negative regulation of transcription, DNA-templated	GO_BiologicalProcess-GOA_23.02.2017_10h01	1.4e-07	6.5e-05	2.2e-12	3.5e-11	[5, 6, 7, 8, 9, 10, 11]	Group15	4.78632	56	[AEBP2, ASXL1, BAG3, BCL3, BCL6, BHLHE41, BMI1, CDKN1B, CIPC, CITED2, CRY1, DAB2, DNAJB5, EGR1, FNIP1, FOXO3, HDAC9, HES1, HIC1, HIVEP1, KAT6B, KMT2D, LDB1, LOXL2, MAF, MXD4, NFKB2, NOTCH3, NR1D2, NR2F6, NR4A2, NRARP, NRIP1, PER2, PPP1R15A, PRICKLE1, RARG, RERE, RUNX1, SALL1, SHC1, SKIL, SMAD7, SNX6, SUFU, SUZ12, THAP11, TRIM29, TXNIP, UBA52, UBP1, USP2, ZBTB20, ZBTB33, ZHX3, ZNF217]
GO:0045893	positive regulation of transcription, DNA-templated	GO_BiologicalProcess-GOA_23.02.2017_10h01	2.3e-07	0.0001	2.2e-12	3.5e-11	[5, 6, 7, 8, 9, 10, 11]	Group15	4.41576	65	[AGTR2, ASXL1, BCL3, BRD4, CCNT2, CD40, CDK13, CITED2, CITED4, CREB5, CSRNP1, CYR61, DAB2, EGR1, ERG, FBXW7, FGF1, FOXO3, FZD5, GMEB1, HAND2, HES1, HIF1A, HIF3A, IER5, IFRD1, KAT6B, KDM6B, KDM7A, KLF1, KLF13, KLF15, KLF2, KMT2D, LDB1, MAF, NFAT5, NFE2L2, NFKB2, NOTCH3, NR1D2, NR4A2, NRIP1, PARK7, PCK1, PPP1R15A, PPRC1, RAF1, RARG, RERE, RNF14, RORC, RUNX1, SALL1, SERTAD2, SETX, SHC1, SMAD1, SMAD6…
GO:1903507	negative regulation of nucleic acid-templated transcription	GO_BiologicalProcess-GOA_23.02.2017_10h01	1.3e-08	6.3e-06	2.2e-12	3.5e-11	[6, 7, 8, 9, 10]	Group15	4.94234	60	[AEBP2, ASXL1, BAG3, BCL3, BCL6, BHLHE41, BMI1, CASP8AP2, CDKN1B, CIPC, CITED2, CRY1, DAB2, DNAJB5, EGR1, FNIP1, FOXO3, HDAC9, HES1, HIC1, HIF3A, HIVEP1, KAT6B, KMT2D, LDB1, LOXL2, MAF, MXD4, MXI1, NFKB2, NOTCH3, NR1D2, NR2F6, NR4A2, NRARP, NRIP1, PER2, PPP1R15A, PRICKLE1, RARG, RERE, RUNX1, SALL1, SHC1, SKIL, SMAD7, SNX6, SUFU, SUZ12, THAP11, TOB1, TRIM29, TXNIP, UBA52, UBP1, USP2, ZBTB20, ZBTB3…
GO:0006357	regulation of transcription from RNA polymerase II promoter	GO_BiologicalProcess-GOA_23.02.2017_10h01	9e-11	4.3e-08	2.2e-12	3.5e-11	[6, 7, 8, 9, 10, 11]	Group15	4.55228	91	[AEBP2, ASXL1, BAG3, BCL3, BCL6, BHLHE41, BMI1, BRD2, BRD4, CCNT2, CD40, CDK13, CHD5, CITED2, CITED4, CRY1, CSRNP1, CYR61, DNAJB5, EGLN3, EGR1, ERG, FBXW7, FGF1, FNIP1, FOXO3, FZD5, GMEB1, HAND2, HDAC9, HES1, HIC1, HIF1A, HIF3A, HIVEP1, IER5, IFRD1, KAT6B, KDM6B, KLF13, KLF15, KLF2, KMT2D, LDB1, MAF, MAX, MXD4, NFAT5, NFE2L2, NFKB2, NOTCH3, NR2F6, NR4A2, NRARP, NRIP1, PARK7, PCK1, PER2, PPP1R15A,…
GO:0000122	negative regulation of transcription from RNA polymerase II promoter	GO_BiologicalProcess-GOA_23.02.2017_10h01	2.7e-06	0.0012	2.2e-12	3.5e-11	[6, 7, 8, 9, 10, 11, 12]	Group15	5.06173	41	[AEBP2, ASXL1, BAG3, BCL6, BHLHE41, BMI1, CITED2, CRY1, DNAJB5, EGR1, FNIP1, FOXO3, HDAC9, HES1, HIC1, HIVEP1, MAF, MXD4, NFKB2, NOTCH3, NR2F6, NR4A2, NRARP, NRIP1, PER2, PPP1R15A, RARG, RERE, SALL1, SKIL, SMAD7, SUFU, SUZ12, THAP11, TRIM29, TXNIP, UBA52, USP2, ZBTB20, ZHX3, ZNF217]
GO:0045944	positive regulation of transcription from RNA polymerase II promoter	GO_BiologicalProcess-GOA_23.02.2017_10h01	3.3e-07	0.00015	2.2e-12	3.5e-11	[6, 7, 8, 9, 10, 11, 12]	Group15	4.73269	54	[ASXL1, BCL3, BRD4, CCNT2, CD40, CDK13, CITED2, CITED4, CSRNP1, CYR61, EGR1, ERG, FBXW7, FGF1, FOXO3, FZD5, GMEB1, HAND2, HES1, HIF1A, HIF3A, IER5, IFRD1, KAT6B, KDM6B, KLF13, KLF15, KLF2, KMT2D, LDB1, MAF, NFAT5, NFE2L2, NFKB2, NOTCH3, NR4A2, NRIP1, PARK7, PCK1, PPRC1, RAF1, RARG, RERE, RUNX1, SALL1, SETX, SMAD1, SMAD6, SMAD7, SSBP4, TCF12, TET3, UBA52, ZMIZ2]
